# Supplementary material
Source: PubMed Central journal article supplement (PMC5242142)
Supplement: NIHMS838824-supplement.pdf [file NIHMS838824-supplement.pdf]

**A**

| allele                   | <i>dNrd1<sup>A</sup></i> | <i>dNrd1<sup>B</sup></i> | <i>dNrd1<sup>C</sup></i> | <i>dNrd1<sup>D</sup></i> |
|--------------------------|--------------------------|--------------------------|--------------------------|--------------------------|
| <i>dNrd1<sup>A</sup></i> | pupa                     |                          |                          |                          |
| <i>dNrd1<sup>B</sup></i> | pupa                     | pupa                     |                          |                          |
| <i>dNrd1<sup>C</sup></i> | pupa                     | pupa                     | pupa                     |                          |
| <i>dNrd1<sup>D</sup></i> | pupa                     | pupa                     | pupa                     | pupa                     |

**B**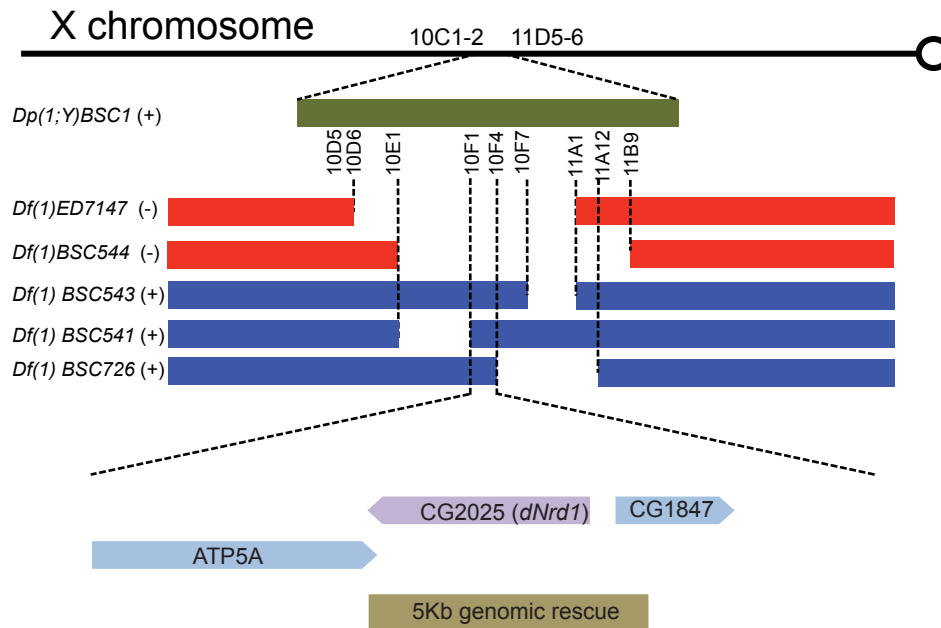**C**

| allele<br>transgene                                         | <i>dNrd1<sup>A</sup></i> | <i>dNrd1<sup>B</sup></i> | <i>dNrd1<sup>C</sup></i> | <i>dNrd1<sup>D</sup></i> |
|-------------------------------------------------------------|--------------------------|--------------------------|--------------------------|--------------------------|
| 80kb <i>P[acman]</i><br><i>Dp(1;3)DC246</i>                 | +                        | +                        | +                        | +                        |
| 20kb <i>P[acman]</i><br><i>CH322-77E05</i>                  | +                        | +                        | +                        | +                        |
| 5kb genomic<br>rescue                                       | +                        | +                        | +                        | +                        |
| Ubiquitous-Gal4<br>>UAS- <i>dNrd1-V5</i>                    | +                        | +                        | +                        | +                        |
| Ubiquitous-Gal4><br>UAS-human <i>NRD1-V5</i>                | +                        | +                        | +                        | +                        |
| Ubiquitous-Gal4><br>UAS-human <i>NRD1</i><br>(M636Vstop)-V5 | -                        | -                        | -                        | -                        |
| Ubiquitous-Gal4<br>>UAS- <i>dNrd1-mcherry</i>               | -                        | -                        | -                        | -                        |

**D**

| Species |            | <i>H. sapiens</i> | <i>B. taurus</i> | <i>M. musculus</i> | <i>R. norvegicus</i> | <i>G. gallus</i> |
|---------|------------|-------------------|------------------|--------------------|----------------------|------------------|
| DNRD1   | Identity   | 37%               | 37%              | 37%                | 37%                  | 36%              |
|         | Similarity | 58%               | 58%              | 58%                | 58%                  | 58%              |

**Figure S1**

**A****S2 cells**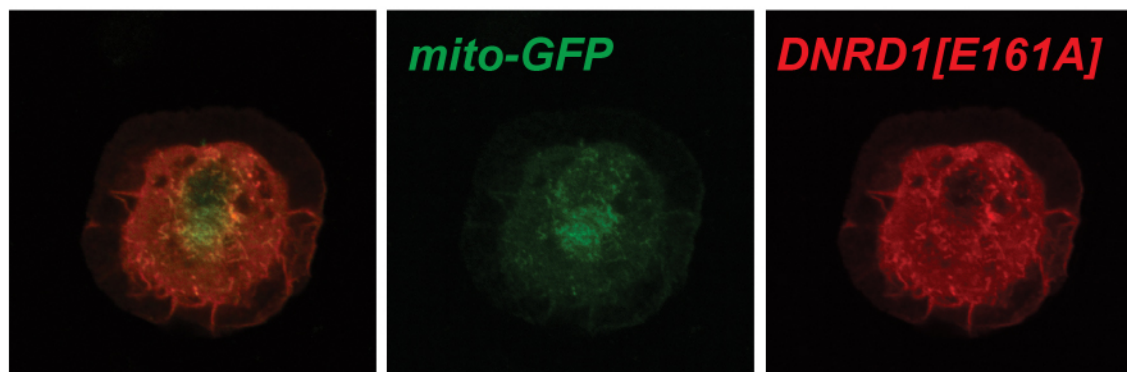

*Act-Gal4>UAS-dNrd1 [E161A]*

**B****Muscle**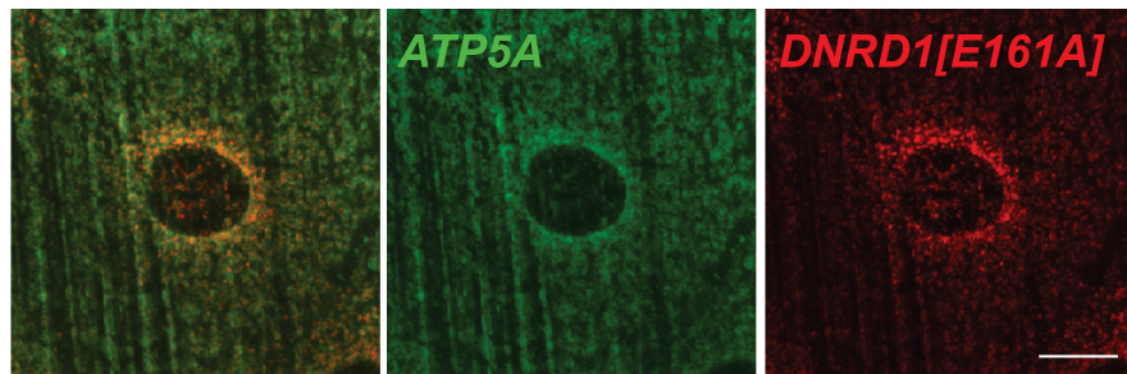

*C57-Gal4>UAS-dNrd1 [E161A]*

*dNrd1<sup>c/y</sup>*

**Figure S2**



**A**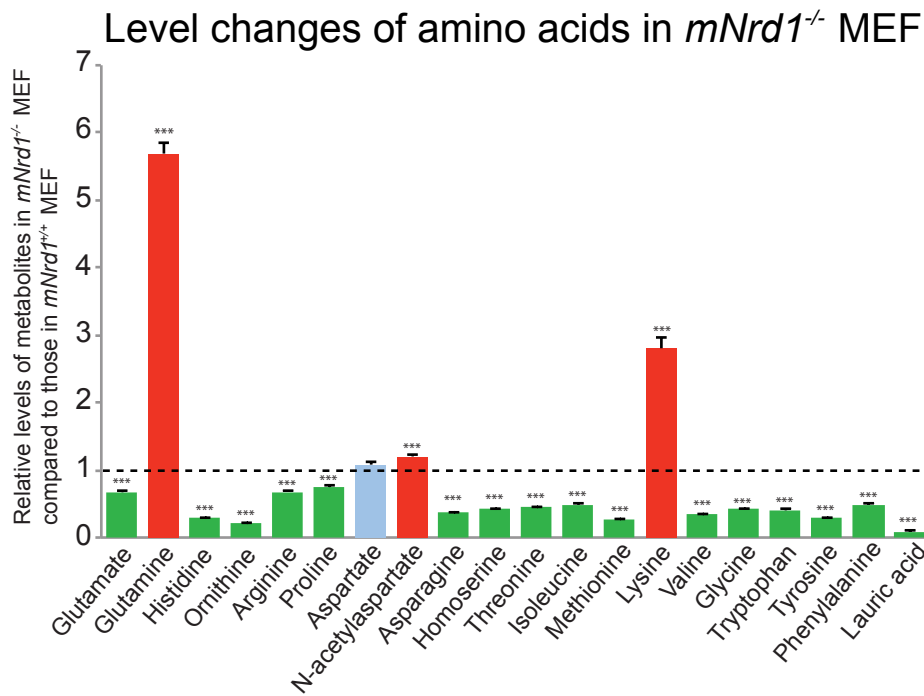**B**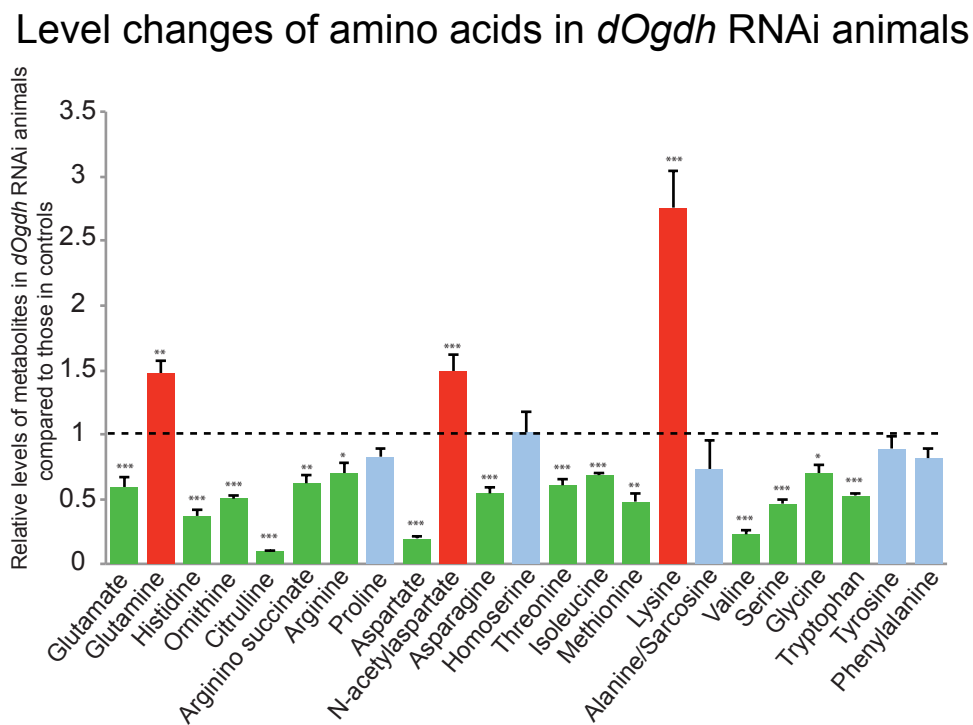**C**

Knock-down of *dOgdh* by RNAi in PRs causes a progressive loss of synaptic transmission

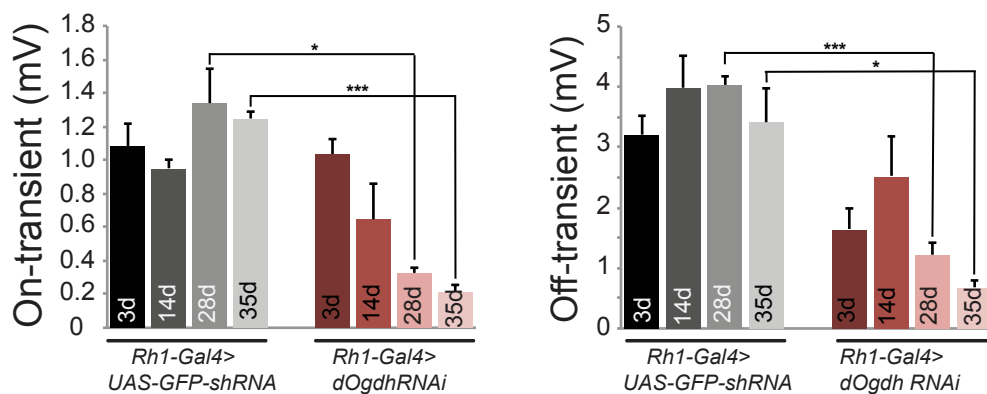

**Figure S4**

**A**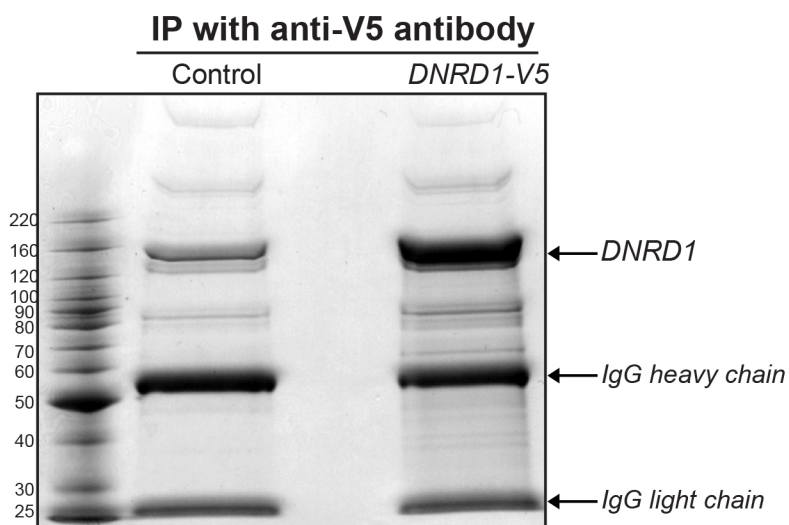**B**

## Subcomplexes of NRD1-interacting mitochondrial proteins

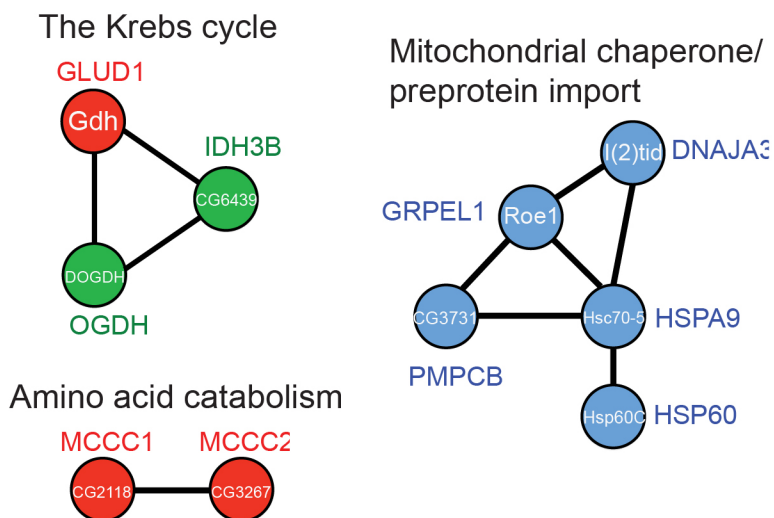**C**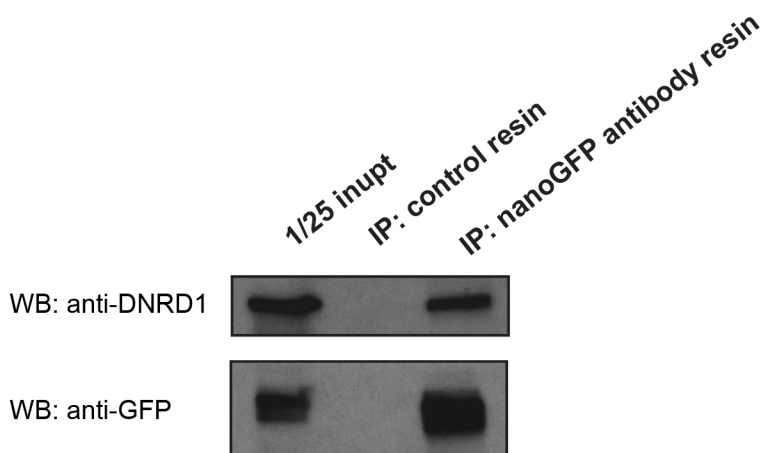

# Figure S5

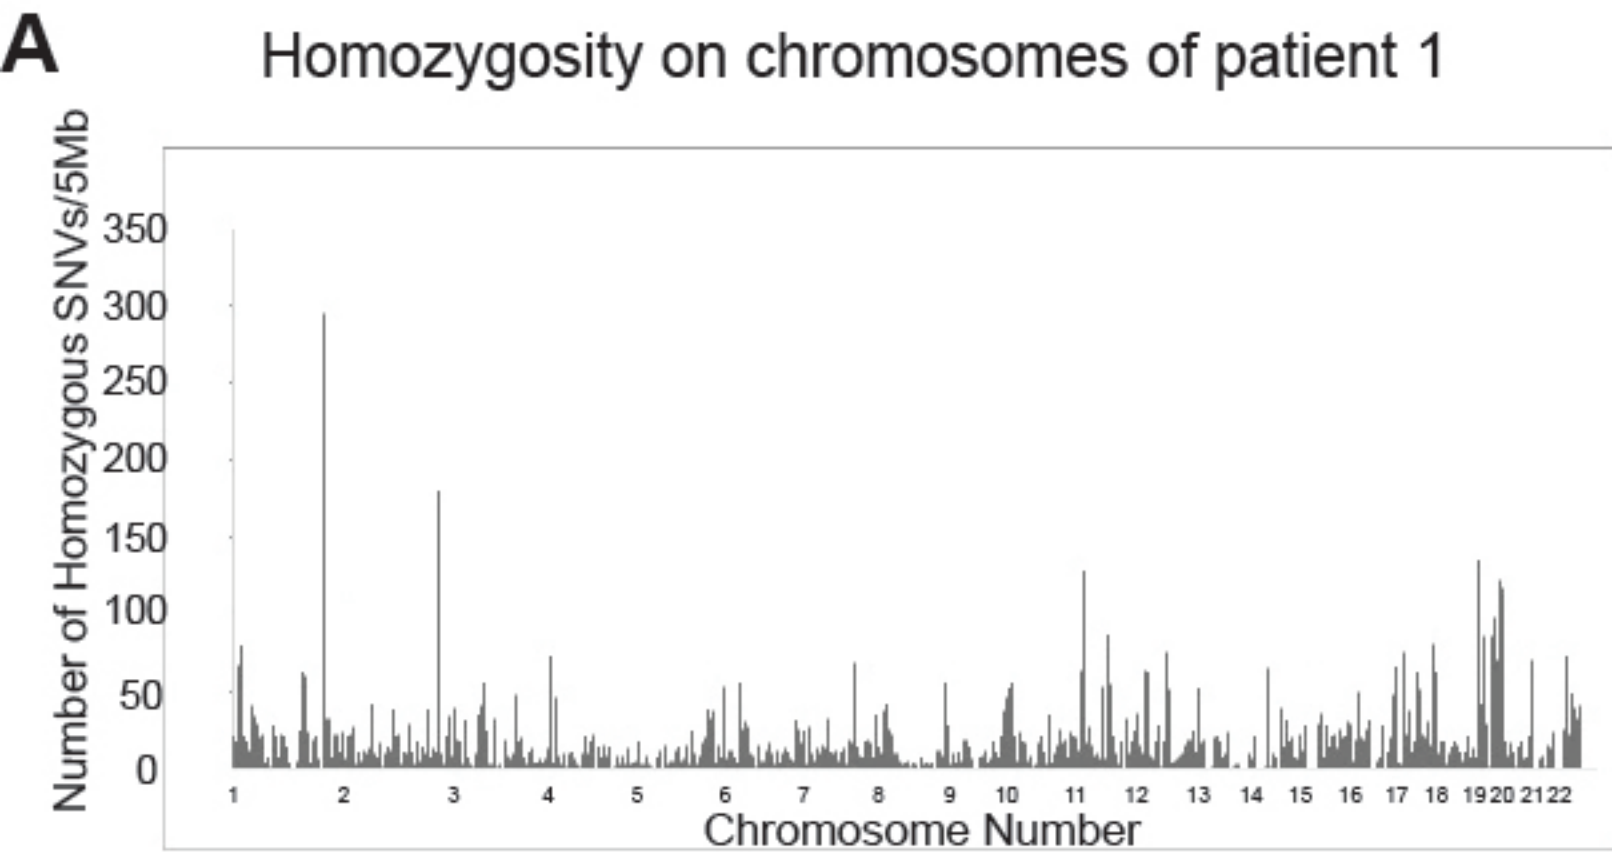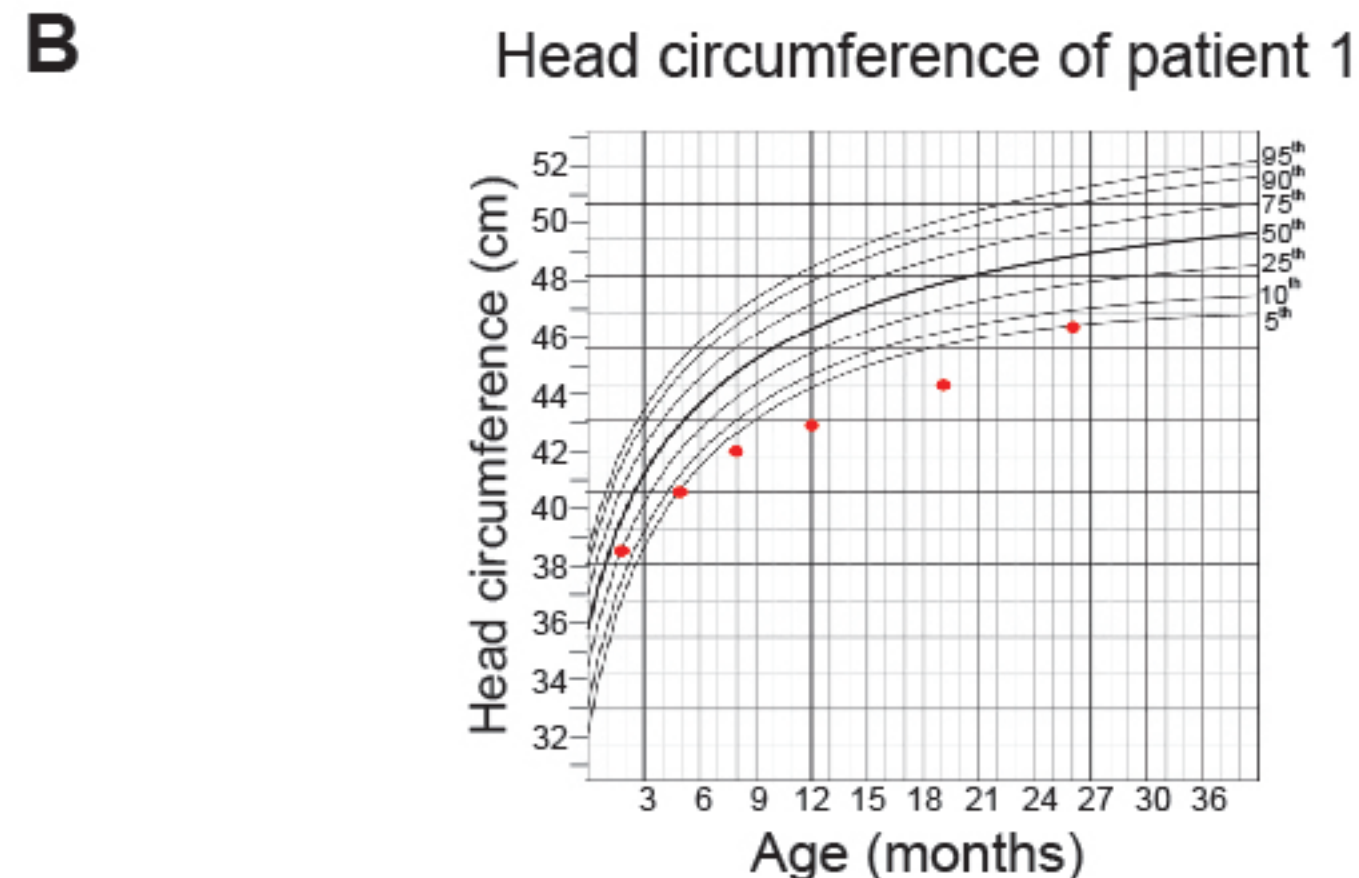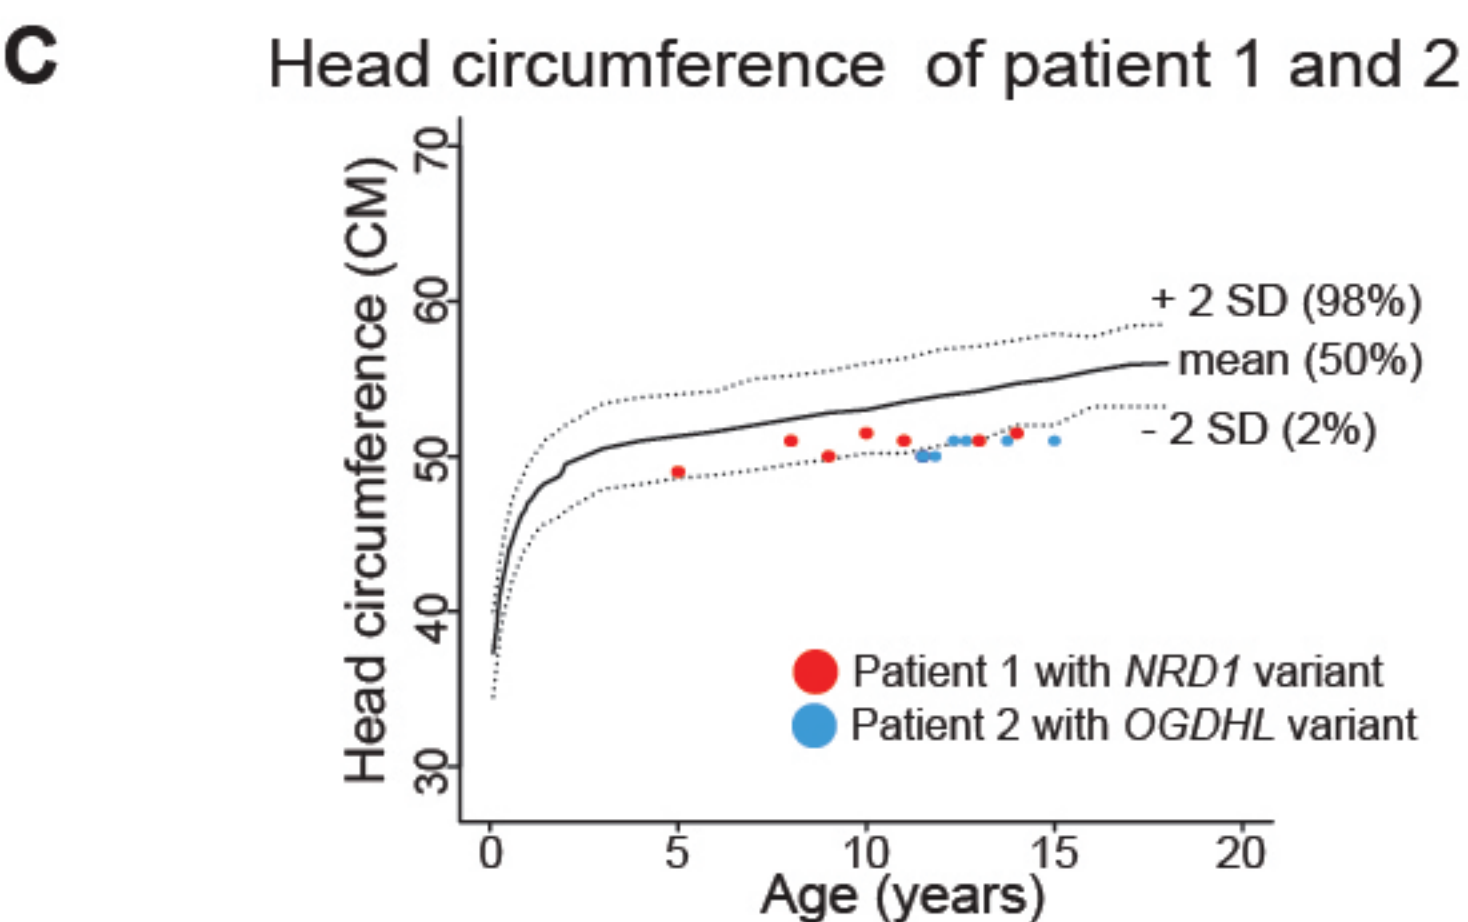

**D** A T2 midaxial image of patient 2 at age 15 years

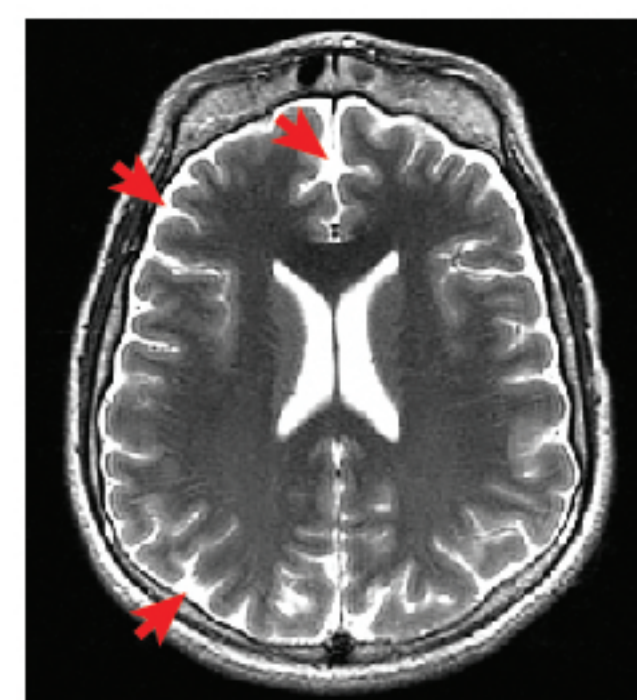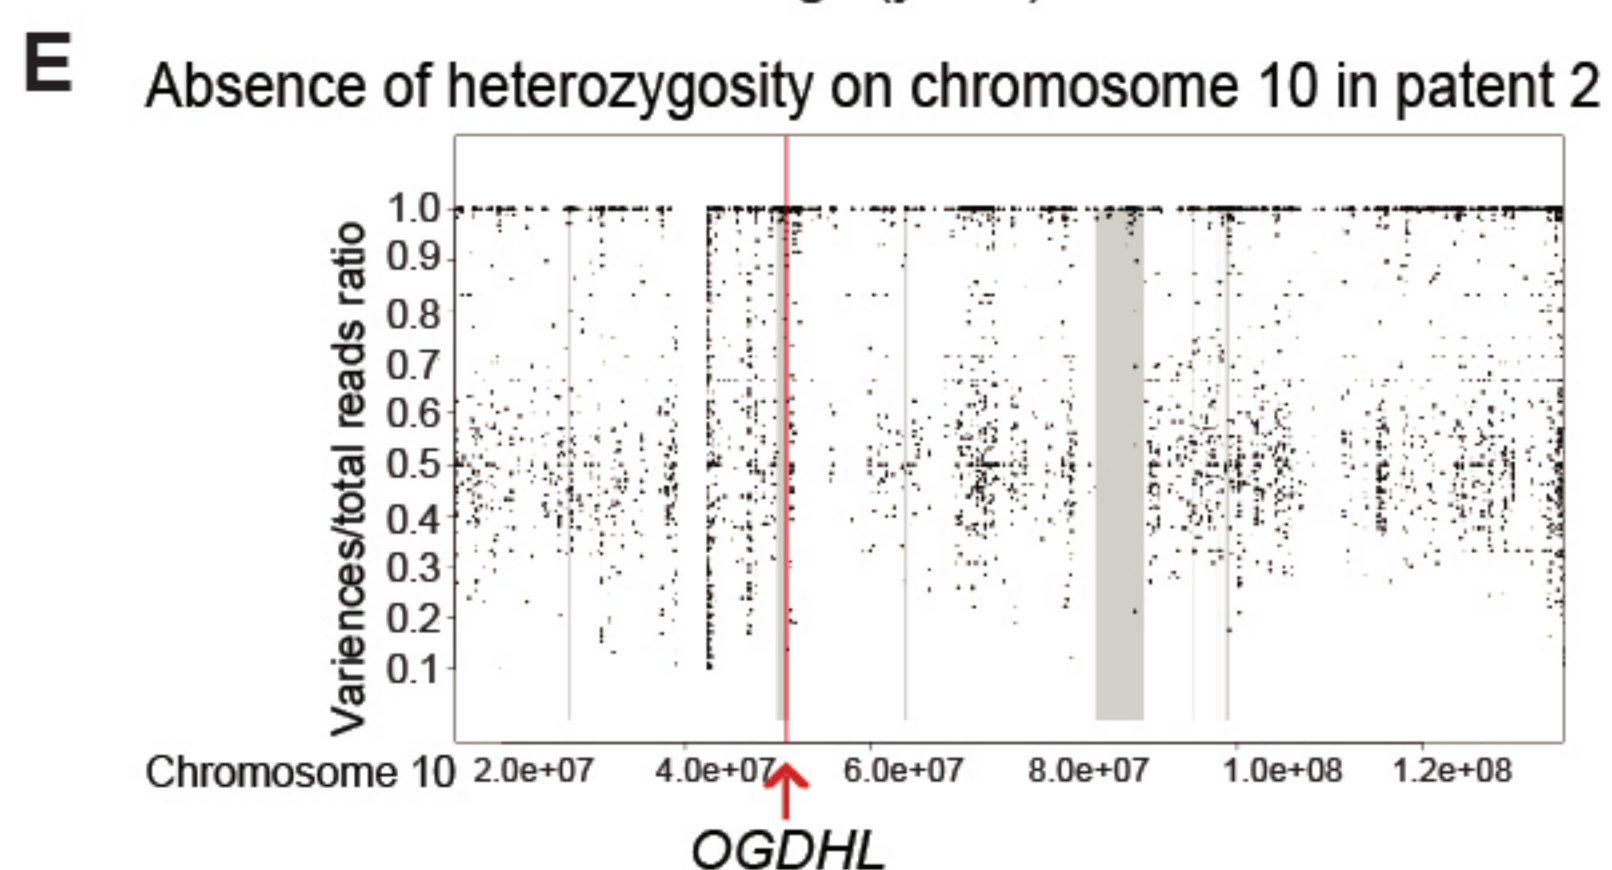

**F** Clinical photograph of patient 2

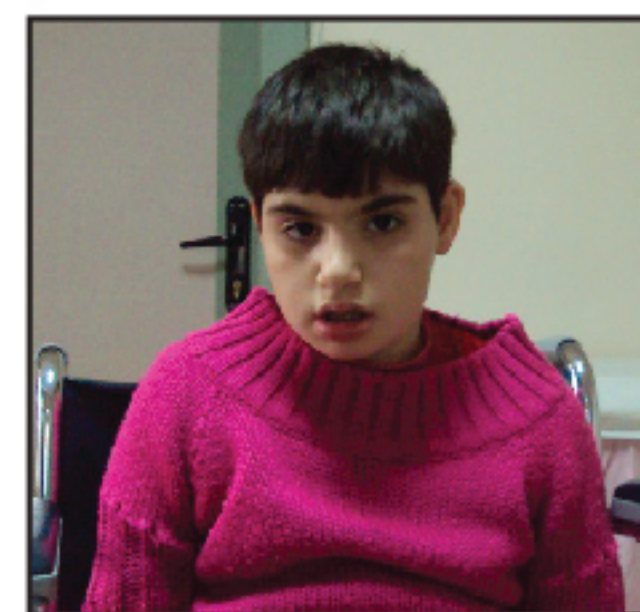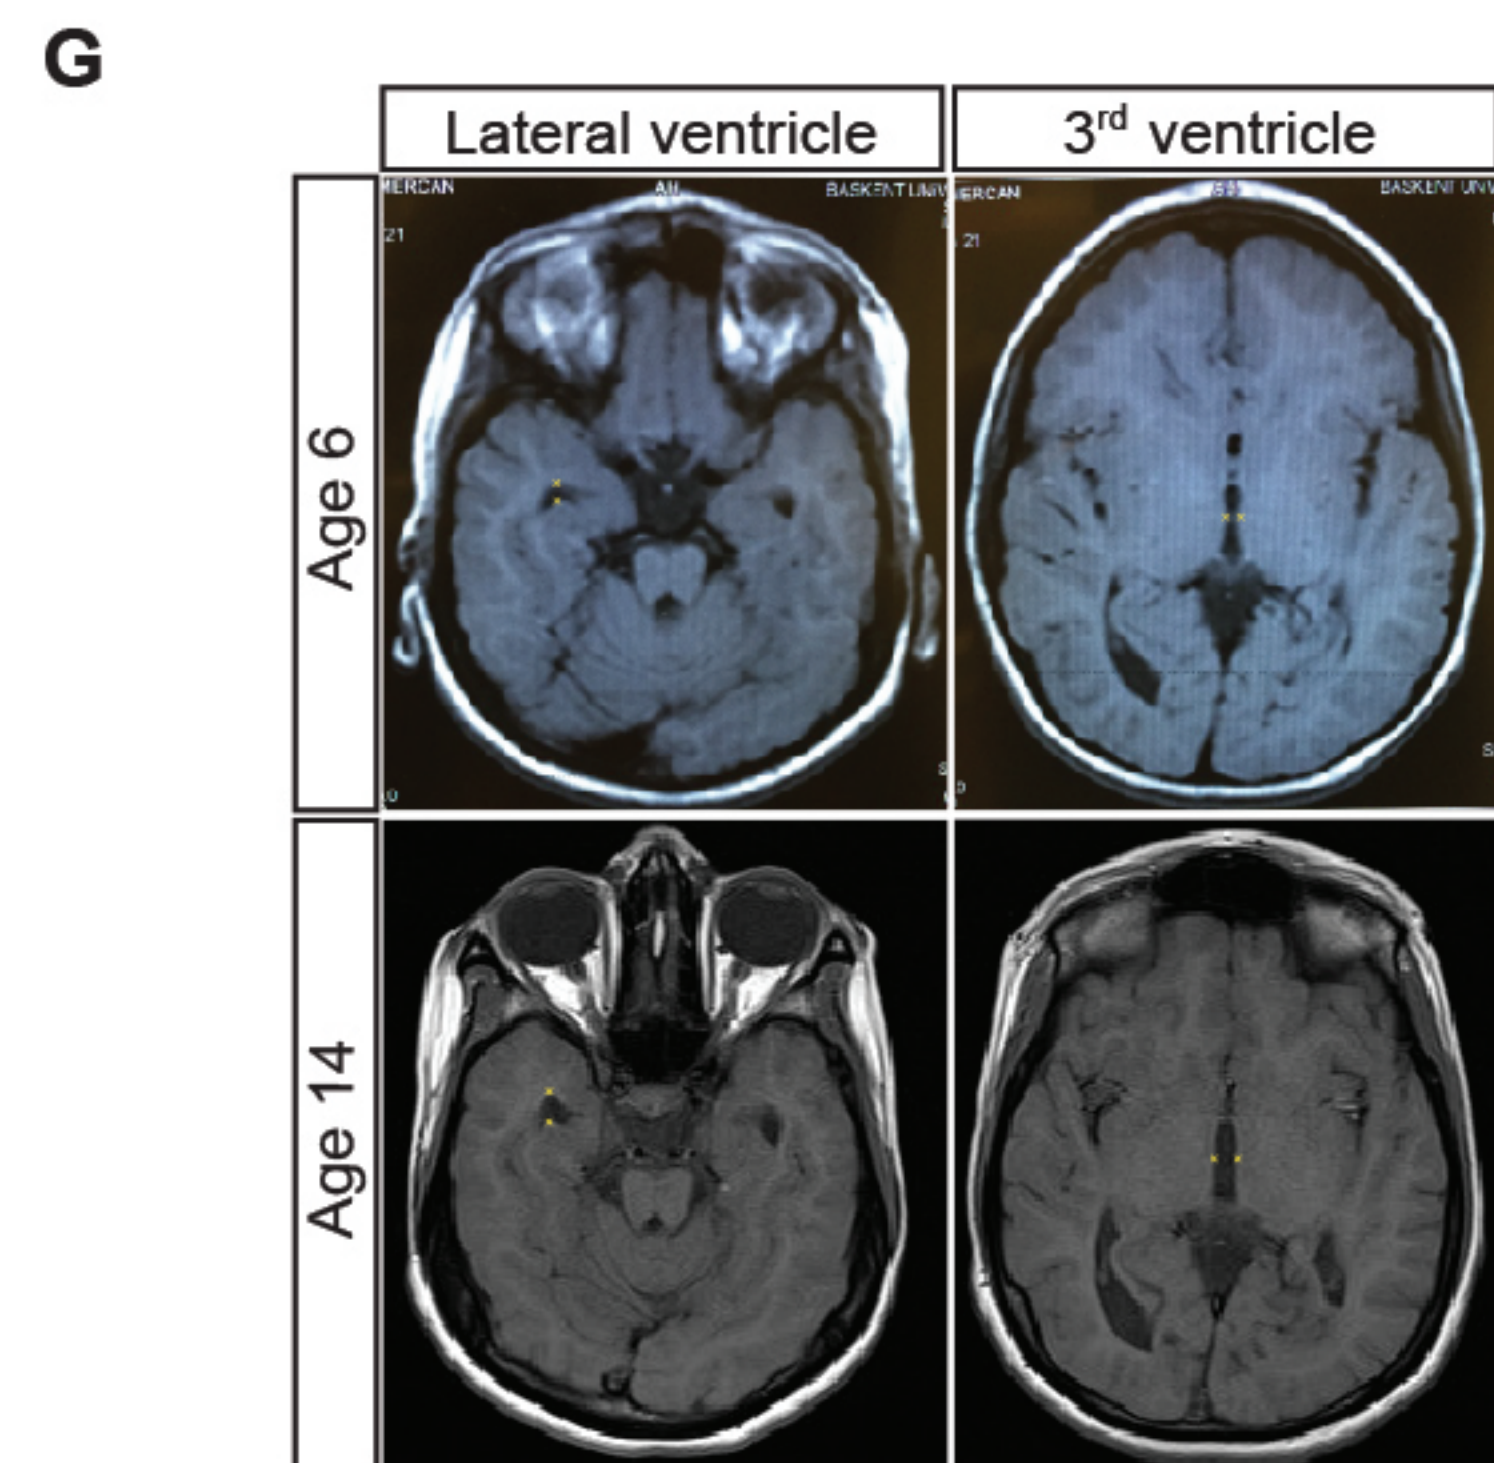

**H** Expression of wildtype OGDHL and OGDH, not mutants rescues ERG defects caused by knockdown of *dOgdh*

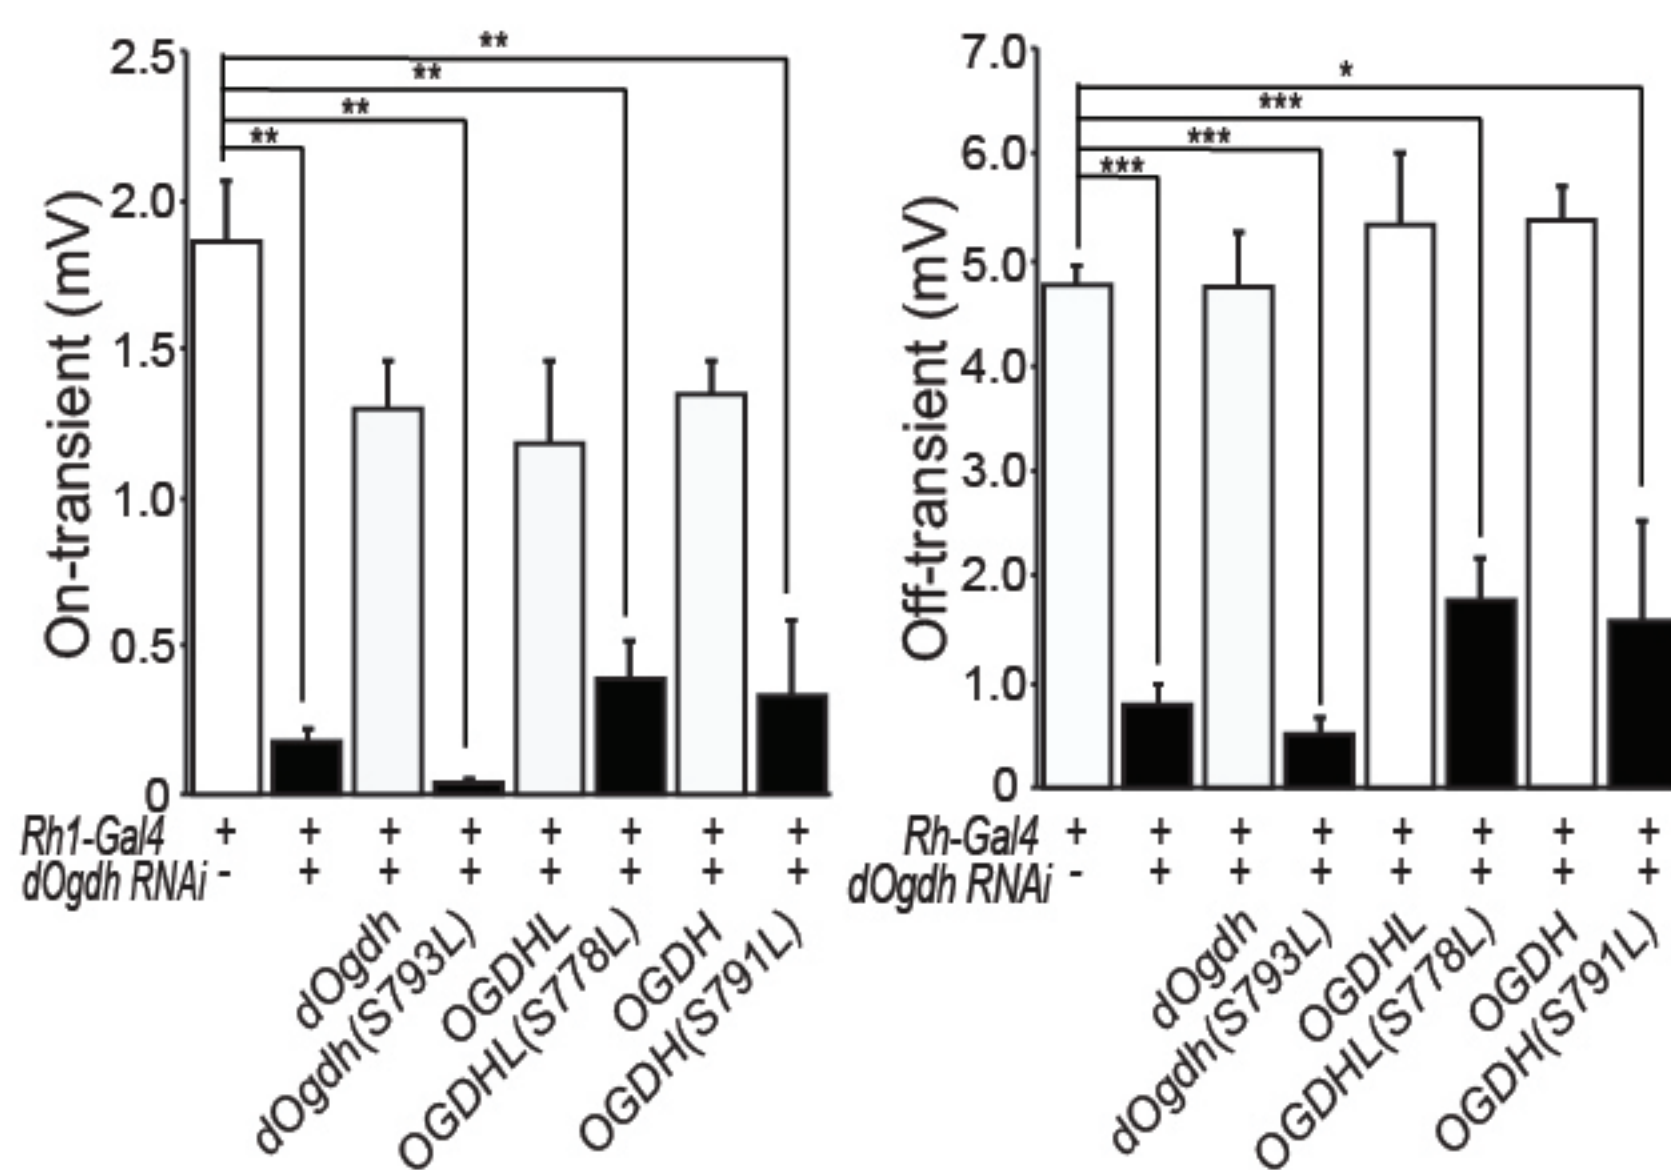

**Figure S6**

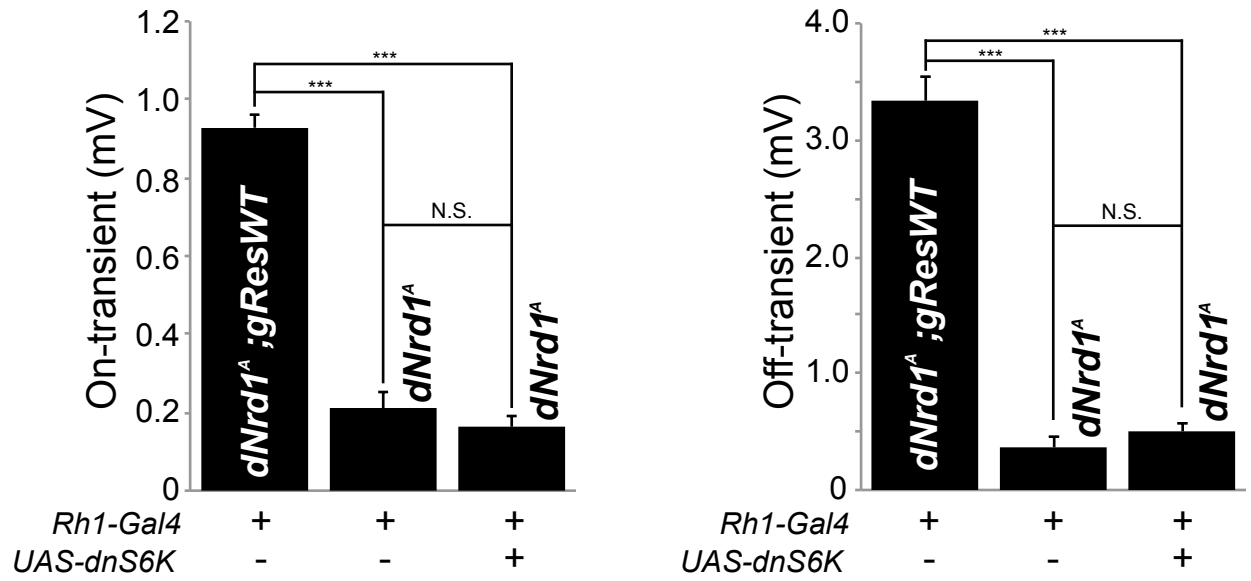

**Figure S7**

## Supplemental Figure Legends

### Figure S1 (Related to Figure 1). Mapping, lethal staging, lethality rescue and evolutionary conservation of *dNrd1*

(A) Lethal staging analysis of four *dNrd1* mutant alleles. (B) Schematic representation of the *dNrd1* locus on the *Drosophila* X chromosome. The dark green bar indicates a large duplication that complements the lethality of mutants. Red bars indicate deficiencies that fail to complement the lethality of mutants. Blue bars indicate deficiencies that complement the lethality of the mutants. (+) indicates complementation. (-) indicates failure of complementation. A 5kb genomic rescue fragment encompassing the *dNrd1* locus (olive green) was used for most assays. (C) The lethality of *dNrd1* mutants was rescued by 80kb *P[acman]* genomic transgene, 20kb *P[acman]* genomic transgenes, 5kb genomic transgene carrying *dNrd1* genomic locus, expressing C-terminally V5 tagged *dNrd1* cDNA ubiquitously (*da-GAL4>UAS- dNrd1-V5*), or expressing C-terminally V5 tagged human *NRD1* cDNA ubiquitously (*da-GAL4>UAS- NRD1-V5*). Expression of the truncated human *NRD1* (p.M636VfsX2) variant identified from patient 1 did not rescue the lethality associated with *dNrd1* mutants, indicating that the p.M636VfsX2 variant is indeed a strong loss of function allele. Rescue was not achieved by expressing a C-terminally mCherry tagged *dNrd1* ubiquitously (*da-GAL4>UAS- dNrd1-mCherry*), indicating that the mCherry tagged *DNRD1* is not functional. Overexpression of *dNrd1-mCherry* ubiquitously in a wild-type background kills the animals (data not shown), suggesting that *DNRD1-mCherry* acts as a dominant negative protein. We also found that this protein does not localize to the mitochondria, so *UAS-dNrd1-mCherry* transgenic flies was not further used in the following studies (D) The amino acid sequences of *NRD1* are conserved from fruit fly to mammals.

### Figure S2 (Related to Figure 2). Point mutation [E161A] in *DNRD1* alters subcellular localization of *DNRD1*

(A) Confocal micrographs of S2 cells co-expressing mito-GFP (green) and *dNrd1* carrying point mutation (E161A) (*dNrd1[E161A]-V5*), (red). Scale bars, 10µm. (B) Confocal micrographs of *dNrd1<sup>C</sup>* mutant larval muscle expressing *dNrd1[E161A]-V5* (red) by muscle driver (*C57-Gal4*). ATP5A (green) labels mitochondria. Scale bars, 10µm.

### Figure S3 (Related to Figure 4). Generation of intronic GFP-tagged *dOgdh*

(A) MiMIC insertion in *dOgdh* (also referred to as *Neural conserved at 73EF* (*Nc73EF*): [Top] A schematic of the *dOgdh* gene region based on FlyBase annotation release FP2014\_06. The orange boxes indicate coding exons. Dark blue boxes indicate 5'- and 3'-UTR. The isoforms are labeled by the names and molecular weights of the translated proteins. The Mi{MIC} insertion, *MI06026* is indicated by the red triangle and its insertion position is shown by a red dotted line. [Middle] Protein trapping by Recombinase-Mediated Cassette Exchange (RMCE): The MiMIC transposable element consists of a splice acceptor (SA; gray) followed by stop codons in all three reading frames (red), an EGFP coding sequence (green), a SV40 polyadenylation signal (pale blue), and the *yellow<sup>+</sup>* marker (yellow). Two inverted *attP* sites (orange) and two *Minos* inverted repeats (pink) are positioned at the 5'- and 3'-end of the transposon. The protein trap cassette consists of a SA (gray), an EGFP coding sequence (green) flanked by linker sequences (purple) and a splice donor (SD; gray). [Bottom] When transcribed and translated, *DOGDH* is internally tagged with EGFP. (B) Confocal micrographs of larval muscle in a fly carrying an artificial exon that encodes EGFP, inserted in a coding intron of *dOgdh*. The EGFP-tagged *DOGDH* protein (*DOGDH-GFP*) is detected by anti-GFP antibody (green). ATP5A (red) labels mitochondria. Scale bars, 5µm.

### Figure S4 (Related to Figure 4). Knockdown of *dOgdh* phenocopies loss of *Nrd1* in fly and *mNrd1* in MEF

(A) LC-MS analysis of ratio of amino acids levels of *mNrd1<sup>-/-</sup>* MEF to those in wild type MEF. (B) LC-MS analysis of ratio of amino acids levels of *dOgdh RNAi* larvae (*UAS-dOgdh RNAi* (v50393)/*Actin-Gal4*) to those in control larvae (+/*Actin-Gal4*). Error bars indicate s.e.m. P values were calculated using Student's t-test. \**P* <0.05, \*\**P* <0.01, \*\*\**P* <0.001. (C) Quantification of the on- and off-transients of ERGs in PRs where *dOgdh* is knocked down



by RNAi (*Rh1-Gal4/UAS-dOgdh RNAi*) and control PRs (*Rh1-Gal4>UAS-GFP-shRNA*) in flies aged for multiple time points. P values were calculated using Student's t-test. \**P* <0.05, \*\*\**P* <0.001.

**Figure S5 (Related to Figure 5). DNRD1 physically interacts with DOGDH as well as mitochondrial chaperones**

(A) Anti-V5 antibody is used for immunoprecipitation. Arrows indicate enriched DNRD1 in immunoprecipitated proteins from C-terminally V5 tagged-DNRD1-expressing larvae (*da-Gal4>UAS-dNrd1-V5*), when compared to proteins immunoprecipitated from control larvae (*da-Gal4*, no *UAS*). The two other arrows indicate an IgG heavy chain and an IgG light chain, respectively. Numbers beside the molecular weight marker (the first lane) denote molecular weights. (B) Bioinformatics analyses based on STRING and COMPLEAT show three subcomplexes of DNRD1-interacting proteins. (C) Co-immunoprecipitation using anti-GFP nano-antibody from lysates of DOGDH-GFP larvae. Western blots were performed using either anti-DNRD1 or anti-GFP antibody.

**Figure S6 (Related to Figure 6). Patients with *NRD1* or *OGDHL* variants exhibit neurodegenerative phenotypes**

(A) A plot of the number of homozygous SNVs/5Mb on all chromosomes of the patient 1. (B) A graph of head circumference from birth to 26 months for patient 1. (C) A graph of head circumference of patient 1 (red circles) from age 5 to 14 and patient 2 from age 11 to 15 (blue circles). The solid line indicates the mean value of head circumference while upper and lower dotted lines indicate 98<sup>th</sup> and 2<sup>nd</sup> percentiles of head circumference, respectively. (D) A T2 midaxial image of patient 1 at age 15 years shows enlarged extracerebral spaces (red arrows). (E) A plot of the variant reads/ total reads ratio on chromosome 10 (i.e. B-allele frequency from WES data) with the grey shaded segments representing detected absence of heterozygosity (AOH) regions in the patient 2. Two blocks of AOH (gray vertical boxes) a large 5.101Mb and 1.287 Mb (chr10: 49,938,185-51,225,724) are observed on chromosome 10. The smaller interval encompasses the position of the *OGDHL* gene (GRCH27/hg19, chr10:50,942,687-50,970,425; red vertical line) in which the homozygous variants were observed. (F) Clinical photograph of patient 2 (Individual BAB4852). (G) Comparison of cerebral MRI images of patient 2 at age 6 and 14. Note the enlargement of temporal horns of the lateral ventricle and 3<sup>rd</sup> ventricle (yellow crossmarks). (H) Quantification of the on- and off-transients of ERGs in PRs expressing *dOgdh RNAi* (*Rh1-Gal4/UAS-dOgdh RNAi*), together with *UAS* only (2<sup>nd</sup> bar of each graph), *UAS-dOgdh*, *UAS-dOgdh*<sup>S793L</sup>, *UAS-human OGDHL*, *UAS-human OGDHL*<sup>S778L</sup>, *UAS-human OGDHL*, or *UAS-human OGDHL*<sup>S791L</sup> in 21-day-old flies. Expression of human *OGDHL*<sup>WT</sup> or *OGDHL*<sup>WT</sup> rescues the ERG defects caused by knockdown of *dOgdh*, but expression of human *OGDHL*<sup>S791L</sup> or *OGDHL*<sup>S778L</sup> fails to rescue. Error bars indicate s.e.m. P values were calculated using Student's t-test. \**P* <0.05, \*\**P* <0.01, \*\*\**P* <0.001.

**Figure S7 (Related to Figure 7). Expression of dominant negative S6K fails to rescue the ERG defects in *dNrd1* mutants**

Quantification of the on- and off-transients of ERGs in 35-day-old *dNrd1*<sup>A</sup> mutant clones in PRs with or without expressing dominant negative *S6K* (*Rh1-Gal4>UAS-S6k.KQ*) and control PRs (*dNrd1*<sup>A</sup>; *gRes-WT*). Error bars indicate s.e.m. P values were calculated using Student's t-test. \*\*\**P* <0.001. N.S. indicates not statistically significant.

## Supplemental Tables

### Table S1: The list of DNRD1-interacting proteins, related to Figure 5

IP/MS from C-terminally V5 tagged DNRD1 identified DNRD-interacting proteins that include mitochondrial chaperone proteins (blue) as well as metabolic enzymes in the TCA cycle (green), Amino acid metabolism (red), glucose metabolism (orange), and lipid metabolism (yellow).

### Table S2: The list of candidate variants in Patient 1 and Patient 2, related to Figure 6

WES on eight individuals in *NRD1* family identified homozygous variants and compound heterozygous variants unique in Patient 1. WES on parents and proband in *OGDHL* family identified homozygous variants, compound heterozygous variants, and *de novo* variants unique in Patient 2.

### Table S3: Neurological Phenotypes of *Nrd1* knockout mice, Patient 1 and Patient 2, related to Figure 6 and discussion

Similarities and differences of neurological phenotypes among *Nrd1*<sup>-/-</sup> mouse, Patient 1 with homozygous recessive *NRD1* variant (NM\_002525.2:exon 17:c.1906\_1907delAT: p.M636VfsX2)] and Patient 2 with homozygous recessive *OGDHL* variant (NM\_018245:exon18:c.C2333T:p.S778L).

**Supplemental Table 1**

| Fly ID no.         | Fold enrichment in DNRD1 Sample | <i>Drosophila</i> | Human homologue | mitochondrial protein | pathway                            |
|--------------------|---------------------------------|-------------------|-----------------|-----------------------|------------------------------------|
| FBgn0030344        | 1033                            | CG2025            | NRD1            |                       | MPP                                |
| FBgn0001220        | 93                              | Hsc70-5           | HSPA9           | mitochondrial         | mitochondrial chaperone            |
| FBgn0003888        | 68                              | $\beta$ Tub60D    |                 |                       | cytoskeleton                       |
| FBgn0000043        | 55                              | Act42A            |                 |                       | cytoskeleton                       |
| FBgn0001128        | 53                              | Gpdh              | GPD1            |                       | glycolysis                         |
| FBgn0000046        | 49                              | Act87E            |                 |                       | cytoskeleton                       |
| FBgn0037607        | 47                              | CG8036            | TKTL2           |                       | pentose phosphate pathway          |
| FBgn0038681        | 43                              | Cyp12a4           |                 |                       |                                    |
| FBgn0001098        | 37                              | Gdh               | GLUD1           | mitochondrial         | amino acid catabolism              |
| FBgn0031728        | 35                              | Hsp60C            | HSP60           | mitochondrial         | mitochondrial chaperone            |
| FBgn0032069        | 32                              | CG9468            |                 |                       |                                    |
| FBgn0250906        | 24                              | Pgk (phosphog     | PGK1            |                       | glycolysis                         |
| FBgn0036892        | 23                              | Lon               | LONP1           | mitochondrial         | mitochondrial protease/chaperone   |
| FBgn0030737        | 23                              | CG9914            | CRYL1           |                       | glucose catabolism                 |
| FBgn0004907        | 23                              | 14-3-3 $\zeta$    |                 |                       |                                    |
| FBgn0010352        | 22                              | Nc73EF            | OGDH            | mitochondrial         | the TCA cycle                      |
| FBgn0034087        | 21                              | clu               |                 | mitochondrial         | mitochondria biogenesis            |
| FBgn0039877        | 20                              | CG2118            | MCCC1           | mitochondrial         | amino acid catabolism              |
| FBgn0026761        | 20                              | Trap1             | TRAP1           | mitochondrial         | mitochondrial chaperone            |
| <b>FBgn0023507</b> | 19                              | CG3835            | D2HGDH          | mitochondrial         | amino acid catabolism              |
| FBgn0031703        | 19                              | CG12512           | ACSF2           | mitochondrial         | lipid metabolism                   |
| FBgn0016715        | 17                              | Reg-2             |                 | mitochondrial         |                                    |
| FBgn0038922        | 17                              | CG6439            | IDH3B           | mitochondrial         | the TCA cycle                      |
| FBgn0020238        | 16                              | 14-3-3 $\epsilon$ | YWHAE           |                       |                                    |
| FBgn0038680        | 16                              | Cyp12a5           |                 |                       |                                    |
| FBgn0040237        | 16                              | bor               | ATAD3A          | mitochondrial         | nucleoids stabilization            |
| FBgn0002174        | 15                              | l(2)tid           | DNAJ3           | mitochondrial         | mitochondrial chaperone            |
| FBgn0031908        | 15                              | CG5177            |                 |                       |                                    |
| FBgn0024556        | 14                              | EfTuM             | TUFM            | mitochondrial         | translation in mitochondria        |
| FBgn0011661        | 14                              | Moesin            | MSM             |                       | cytoskeleton                       |
| FBgn0026370        | 14                              | SRPK              | SRPK1           |                       | splicing                           |
| FBgn0053196        | 13                              | dp                |                 |                       |                                    |
| FBgn0024958        | 13                              | Irp-1A            | ACO1            |                       | the TCA cycle                      |
| FBgn0024238        | 13                              | Fimbrin           | LCP1            |                       | cytoskeleton                       |
| FBgn0038271        | 13                              | CG3731            | PMPCB           | mitochondrial         | mitochondrial processing peptidase |
| FBgn0063497        | 12                              | GstE3             |                 |                       | redox                              |

|             |    |           |          |               |                                         |
|-------------|----|-----------|----------|---------------|-----------------------------------------|
| FBgn0032889 | 12 | CG9331    |          |               |                                         |
| FBgn0004868 | 12 | Gdi       | GDI1     |               |                                         |
| FBgn0003942 | 11 | RpS27A    | RPS27A   |               |                                         |
| FBgn0037913 | 11 | fabp      | FABP7    |               |                                         |
| FBgn0086347 | 11 | Myo31DF   | MYO1D    |               | cytoskeleton                            |
| FBgn0051354 | 10 | Hsp70Bbb  | HSPA1A   |               | chaperone                               |
| FBgn0261565 | 10 | Lmpt      | FHL2     |               |                                         |
| FBgn0029823 | 10 | CG3011    | SHMT1    | mitochondrial | 1-carbon metabolism-purine biosynthesis |
| FBgn0034046 | 10 | tun       | WDYHV1   |               |                                         |
| FBgn0003189 | 10 | r         | CAD      |               | pyrimidine biosynthesis                 |
| FBgn0026415 | 10 | ldgf4     |          |               |                                         |
| FBgn0027590 | 10 | GstE12    |          |               | redox                                   |
| FBgn0027779 | 10 | VhaSFD    | ATP6V1H  |               |                                         |
| FBgn0032715 | 10 | CG17597   |          |               |                                         |
| FBgn0265137 | 10 | Spn42Da   | SERPINI1 |               |                                         |
| FBgn0013954 | 10 | FK506-bp2 |          |               |                                         |
| FBgn0031418 | 9  | CG3609    | DHDL     | mitochondrial | xenobiotics                             |
| FBgn0014877 | 9  | Roe1      | GRPEL1   | mitochondrial | mitochondrial chaperone                 |
| FBgn0042083 | 9  | CG3267    | MCCC2    | mitochondrial | amino acid catabolism                   |
| FBgn0012034 | 9  | AcCoAS    | ACSS2    |               | lipid                                   |
| FBgn0038745 | 9  | CG4538    | CLPX     | mitochondrial | mitochondrial protease/chaperone        |
| FBgn0030968 | 9  | CG7322    | DCXR     |               | glucose catabolism                      |

Color codings for the major pathways

|                         |
|-------------------------|
| TCA cycle               |
| Amino acid metabolism   |
| Glucose metabolism      |
| Lipid metabolism        |
| mitochondrial chaperone |

## Supplemental Table 2

| Homozygous variants unique in proband in NRD1 family   |                            |            |                            |                 |                  |                      |                       |                            |                                                                 |                                                           |
|--------------------------------------------------------|----------------------------|------------|----------------------------|-----------------|------------------|----------------------|-----------------------|----------------------------|-----------------------------------------------------------------|-----------------------------------------------------------|
| Gene name                                              | key                        | Zygoty     | Mutation_type_Refseq.      | ExAC (MAF)      | nsdb_SI FT_score | nsdb_SIFT_prediction | nsdb_Polyp hen2_score | nsdb_Polyphen2_p rediction | OMIM                                                            | Comments                                                  |
| <b>NRD1</b>                                            | <b>1:52277741_CAT&gt;C</b> | <b>Hom</b> | <b>frameshift_deletion</b> | <b>1.65E-05</b> | <b>n/a</b>       | <b>n/a</b>           | <b>n/a</b>            | <b>n/a</b>                 | <b>NA</b>                                                       |                                                           |
| FAM151A                                                | 1:55080445_C>T             | Hom        | nonsynonymous_SNV          | 7.43E-05        | 0.4              | Tolerated            | 0.117                 | benign                     | NA                                                              | No known disease association, variants predicted benign   |
| RNF34                                                  | 12:121855611_G>A           | Hom        | nonsynonymous_SNV          | 0.004531        | 0.4              | Tolerated            | 0                     | benign                     | NA                                                              | No known disease association, variants predicted benign   |
| MYO7B                                                  | 2:128387261_G>A            | Hom        | nonsynonymous_SNV          | 0.009255        | 0.92             | Tolerated            | 0.003                 | benign                     | NA                                                              | No known disease association, variants predicted benign   |
| CHMP3                                                  | 2:86790453_T>A             | Hom        | nonsynonymous_SNV          | 8.25E-06        | 0.51             | Tolerated            | 0                     | benign                     | NA                                                              | No known disease association, variants predicted benign   |
| FAM205B                                                | 9:34835361_C>T             | Hom        | ncRNA_exonic               | 0               | 0.01             | Tolerated            | 0.083                 | benign                     | NA                                                              | No known disease association, variants predicted benign   |
| SSX6                                                   | X:47972582_G>A             | Hom        | ncRNA_exonic               | 1.14E-05        | 0.64             | Tolerated            | 0                     | benign                     | NA                                                              | No known disease association, variants predicted benign   |
| Compound het variants unique in proband in NRD1 family |                            |            |                            |                 |                  |                      |                       |                            |                                                                 |                                                           |
| OBSCN                                                  | 1:228481897_A>C            | Het        | nonsynonymous_SNV          | 0.01282         | 0.39             | Tolerated            | 0                     | benign                     | NA                                                              |                                                           |
| OBSCN                                                  | 1:228496025_C>G            | Het        | nonsynonymous_SNV          | 0               | 0.33             | Tolerated            | 0                     | benign                     | NA                                                              |                                                           |
| PUS1                                                   | 12:132416633_C>T           | Het        | intronic                   | 0.04258         | 0.02             | Tolerated            | 0.942                 | probably damaging          | Mitochondrial myopathy and sideroblastic anemia 1 [MIM:600462]' | Variants uncertain significance, phenotype not consistent |
| PUS1                                                   | 12:132416813_G>A           | Het        | nonsynonymous_SNV          | 0.01618         | 0.19             | Tolerated            | 0                     | benign                     | Mitochondrial myopathy and sideroblastic anemia 1 [MIM:600462]' | Variants uncertain significance, phenotype not consistent |

| Homozygous variants unique in proband in OGDHL family   |                           |            |                          |                 |                  |                      |                       |                            |                                                                |                                                           |
|---------------------------------------------------------|---------------------------|------------|--------------------------|-----------------|------------------|----------------------|-----------------------|----------------------------|----------------------------------------------------------------|-----------------------------------------------------------|
| Gene name                                               | key                       | Zygoty     | Mutation_type_Refseq.    | ExAC (MAF)      | nsdb_SI FT_score | nsdb_SIFT_prediction | nsdb_Polyp hen2_score | nsdb_Polyphen2_p rediction | OMIM                                                           | Comments                                                  |
| <b>OGDHL</b>                                            | <b>10:50946295_G&gt;A</b> | <b>Hom</b> | <b>nonsynonymous_SNV</b> | <b>8.26E-06</b> | <b>1</b>         | <b>Damaging</b>      | <b>0.997</b>          | <b>probably damaging</b>   | <b>NA</b>                                                      |                                                           |
| KIAA1632                                                | 18:43496517_G>C           | Hom        | nonsynonymous_SNV        | 0               | 0.782555         | Tolerated            | 0.426007              | possibly damaging          | NA                                                             | No known disease association, variants predicted benign   |
| CCT8                                                    | 21:30428834_T>G           | Hom        | nonsynonymous_SNV        | 1.7E-05         | 0.806454         | Tolerated            | 0.496407              | possibly damaging          | NA                                                             | No known disease association, variants predicted benign   |
| TIAM1                                                   | 21:32624256_C>T           | Hom        | nonsynonymous_SNV        | 0               | 0.54             | Tolerated            | 0.001                 | benign                     | NA                                                             | No known disease association, variants predicted benign   |
| WASL                                                    | 7:123329207_T>A           | Hom        | splicing                 | 0               | 0                | n/a                  | 0                     | n/a                        | NA                                                             |                                                           |
| ARAP1                                                   | 11:72437677_C>T           | Hom        | nonsynonymous_SNV        | 0.002808        | 0.75             | Tolerated            | 0.822                 | possibly damaging          | NA                                                             | No known disease association, variants predicted benign   |
| ATP8B1                                                  | 18:55315737_G>A           | Hom        | nonsynonymous_SNV        | 0.000139        | 1                | Damaging             | 0.97                  | probably damaging          | Cholestasis, benign recurrent intrahepatic' MIM:243300         | Variants uncertain significance, phenotype not consistent |
| ARL13B                                                  | 3:93769712_C>G            | Hom        | nonsynonymous_SNV        | 0.006489        | 1                | Damaging             | 0.78                  | possibly damaging          | Joubert syndrome 8 [MIM:612291]'                               | Variants uncertain significance, phenotype not consistent |
| Compound het variants unique in proband in OGDHL family |                           |            |                          |                 |                  |                      |                       |                            |                                                                |                                                           |
| AP2A2                                                   | 11:984758_C>G             | Het        | splicing                 | 4.14E-05        | 0                | n/a                  | 0                     | n/a                        | NA                                                             |                                                           |
| AP2A2                                                   | 11:988619_A>G             | Het        | nonsynonymous_SNV        | 0.00209         | 0                | n/a                  | 0                     | n/a                        | NA                                                             |                                                           |
| LAMA2                                                   | 6:129786384_A>G           | Het        | nonsynonymous_SNV        | 0.000232        | 0.75             | Tolerated            | 0.648998              | possibly damaging          | Muscular dystrophy, congenital merosin-deficient [MIM:607855]' | Variants uncertain significance, phenotype not consistent |
| LAMA2                                                   | 6:129601231_C>T           | Het        | nonsynonymous_SNV        | 0.005031        | 0.97             | Damaging             | 0.627746              | possibly damaging          | Muscular dystrophy, congenital merosin-deficient [MIM:607855]' | Variants uncertain significance, phenotype not consistent |
| OBSCN                                                   | 1:228456440_G>A           | Het        | nonsynonymous_SNV        | 0               | 0                | n/a                  | 0                     | n/a                        | NA                                                             |                                                           |
| OBSCN                                                   | 1:228461966_C>T           | Het        | nonsynonymous_SNV        | 0.000059        | 0                | n/a                  | 0                     | n/a                        | NA                                                             |                                                           |
| VWA3A                                                   | 16:22142902_G>A           | Het        | splicing                 | 0               | 0                | n/a                  | 0                     | n/a                        | NA                                                             |                                                           |
| VWA3A                                                   | 16:22157653_T>A           | Het        | nonsynonymous_SNV        | 0               | 0                | n/a                  | 0                     | n/a                        | NA                                                             |                                                           |
| De Novo variants unique in proband in OGDHL family      |                           |            |                          |                 |                  |                      |                       |                            |                                                                |                                                           |
| PTCHD2                                                  | 1:11575517_G>T            | Het        | nonsynonymous_SNV        | 0               | 1                | Damaging             | 0.985                 | probably damaging          | NA                                                             | Variants uncertain significance, uncharacterized gene     |

## Supplemental Table 3

| Phenotypic Comparison         | <i>Nrd1</i> <sup>-/-</sup> Mouse<br>(Ohno et al. 2009)                                         | Patient CDMD1122                                                                         | Patient BAB4852                                                                                                               |
|-------------------------------|------------------------------------------------------------------------------------------------|------------------------------------------------------------------------------------------|-------------------------------------------------------------------------------------------------------------------------------|
|                               |                                                                                                | <i>NRD1</i><br>c.1906_1907delAT<br>p.Met636ValfsX2                                       | <i>OGDHL</i><br>c.C2333T<br>p.S778L                                                                                           |
| Developmental delay           | +                                                                                              | +                                                                                        | +                                                                                                                             |
| Microcephaly                  | +                                                                                              | +                                                                                        | +                                                                                                                             |
| Ataxia                        | +                                                                                              | +                                                                                        | +                                                                                                                             |
| Motor impairment              | +                                                                                              | +                                                                                        | +                                                                                                                             |
| Optic nerve hypoplasia        | N/A                                                                                            | +                                                                                        | N/A                                                                                                                           |
| Hypotonia                     | N/A                                                                                            | +                                                                                        | +                                                                                                                             |
| Language problem              | N/A                                                                                            | +                                                                                        | +                                                                                                                             |
| Seizures                      | +                                                                                              | +                                                                                        | -                                                                                                                             |
| MRI: White matter abnormality | N/A                                                                                            | Apparently normal MRI at 8 years                                                         | +                                                                                                                             |
| corpus callosum abnormality   | Myelination defects                                                                            | Apparently normal MRI at 8 years                                                         | Hypoplasia of the corpus callosum                                                                                             |
| Age of Onset                  | Birth                                                                                          | During the 1 year of life                                                                | During the 1 year of life                                                                                                     |
| Survival                      | neurological symptoms after P30 with progression P90-1 year<br><br>80% die in perinatal period | Alive at 15 years of age. Sibling with similar presentation died at the age of 16 month. | Alive at 15 years of age. Sibling with similar presentation died at the age of 28 years after being bedridden for many years. |

NA: not analyzed

## Supplemental Experimental Procedures

### Clinical Case Histories

#### Patient 1 – M636VfsX2 in *NRD1*

Patient 1 (CDMD1122), the proband in Figure 2A, is a 15 year old male with severe global developmental delay and ataxia. Birth and prenatal history were unremarkable, and the patient initially presented in the first year of life with developmental delay and episodes of ocular deviation, suggestive of seizure activity. EEG (electroencephalogram) was normal. Biochemical studies revealed a slightly elevated C0 (free carnitine) and C4 (butyryl-isobutyryl carnitine) suggestive of short chain acyl-CoA dehydrogenase (SCAD) deficiency. Quantitative urine organic acid analysis showed increased citric acid and milder elevations in urine suberic, sebatic, octanoic, and ethylmalonic acid, consistent with mild SCAD deficiency. *ACADS* (*acyl-CoA dehydrogenase, C-2 to C-3 short chain*) gene sequencing did not identify any pathogenic variants, but showed homozygosity for a susceptibility variant c.625G>A (van Maldegem et al., 2010). Furthermore, the natural history of SCAD did not account for the severity of his developmental delay, therefore this finding was regarded as incidental and not diagnostic. Plasma amino acid profile was normal. At age 4 years, a second EEG was performed due to recurrent episodes during which he would go limp and be cyanotic for more than a minute. EEG results demonstrated areas of focal seizure activity and seizure medication was initiated. Follow up EEG at age 7 years demonstrated continued abnormalities including with generalized slowing of the cerebral activity. Brain MRI findings at age 8 years were as noted in the main text and ophthalmologic exam showed mild optic atrophy. After being seizure-free for more than 3 years, another EEG was performed that was normal and seizure medications were discontinued. At age 14 years of age, the patient remained at the developmental age of 1 year old without spoken language. On clinical exam microcephaly (<3<sup>rd</sup> percentile) was noted without significant dysmorphic features. Head size measurements beyond 5 years of age showed more variability (Figure S6C) (Baxter et al., 2009). However, the measurements collected in the last 10 years document significant microcephaly (Figure S6C). MRI images at 8-years of age show cortical and cerebellar volume loss and enlarged extracerebral spaces (Figure 6C). The latter phenotype is more severe at 15 years of age (Figure S6D). At present he has dysphagia, absent speech, hypotonia, and ataxia. There was also hypotonia, poor motor skills, and inability to walk independently. With assistance, he had a wide based gait with ataxic features. His developmental progression over time was nearly stagnant with rare incremental gains in skills without significant regression in milestones consistently noted. Patient remains on a liquid to pureed diet due to difficulty swallowing, nausea, and chronic constipation. Additional workup prior to clinical exome sequencing included a normal karyotype, and SNP chromosomal microarray studies consistent with segmental homozygosity on multiple chromosomes but without copy number gains or losses.

The p.M636VfsX2 variant is within a stretch of homozygosity spanning 10Mb on chromosome 1 (Figure S6A). Over the proband's entire genome, we observed five stretches of homozygosity that are larger than 5Mb, accounting for 1.8% of genome. This amount of homozygosity in the genome is consistent with a distant relationship between the parents as they both originate from a remote village in Central America.

#### Patient 2 - S778L in *OGDHL*

Patient 2 (BAB4852), the proband in Figure 7D, is a 15 year old girl (BAB4852) with a corpus callosum abnormality. The birth and prenatal history were unremarkable with no evidence of trauma. The patient was able to sit unsupported after 1 year, but never walked and has remained wheelchair dependent. This patient currently has severe intellectual disability and motor dysfunction of unknown cause which had been previously attributed to with cerebral palsy. Her clinical exam revealed hypertonicity and spasticity in the lower extremities with increased deep tendon reflexes. No seizures have been documented. Clinical examination did not suggest any prominent dysmorphic features, although some synophrys and a large mouth were noted (Figure S6F). A brain MRI at age 6 years was most significant for a hypoplastic corpus callosum. Prominent cerebellar volume loss was also noted. At age 14 years a repeat brain MRI was obtained and notable findings included enlarged temporal horns of the lateral ventricle and 3<sup>rd</sup> ventricle compared to those at age 6 (Figure S6G). The proband had an elder brother who died at age 28 years. His parents described a very similar progressive neurological decline, although he died several years before the sequencing evaluation of the proband and no DNA sample was available for study. Brain MRIs from the 6 year old proband revealed a hypoplastic corpus callosum and prominent cerebellar volume loss (Figure 6G).

Moreover, MRI images at 14 years of age exhibit enlarged temporal horns of the lateral ventricle and 3<sup>rd</sup> ventricle when compared to those at 6 years of age (Figure S6G). Head circumference at age 14 was below the 2<sup>nd</sup> percentile (Figure S6C).

Additional workup prior to the exome sequencing through the Center for Mendelian Genomics (CMG) also included normal urine organic acids and normal plasma amino acids. The patient had exome sequencing as part of a study within the CMG of a cohort of Turkish patients with brain malformations. She was found to have a homozygous variant in *OGDHL* (NM\_018245:exon18:c.C2333T:p.S778L) (Figure 6E). The p.S778L variant occurs in one heterozygote in the ExAC database (MAF=8.26 E-06), indicating that this variant is extremely rare. We performed WES on the proband, and both parents yielding a set of candidate variants in 13 genes, 3 of which are in known disease genes inconsistent with the phenotypes (Supplemental Table 2). The proband carries one coding *de novo* variant in an uncharacterized gene in addition to eight candidates with homozygous variants (Supplemental Table 2). Of these eight candidates, the variants in five genes were predicted to be benign whereas three are potentially damaging. The allele found in *ARL13B* (JBTS8) [MIM:612291] was found to have a high frequency in the population, and the patient MRI was not consistent with the known syndrome linked to that gene (Joubert syndrome 8). *ATP8B1* has been linked with a liver cholestasis, a phenotype not observed in our patient (Supplemental Table 2).

### Functional Validation of a Missense Variant in *OGDHL* in Patient 2

Functional validation of the missense variant in *OGDHL* required the generation of a severe loss of function mutation in *dOgdh*, assessment of the phenotypes associated with loss of *dOgdh in vivo*, rescue of the phenotypes with the fly and human cDNAs, and testing the missense variant observed in the patient for its ability to rescue the phenotypes. Unfortunately, ubiquitous Gal4 drivers such as *Actin-*, *tubulin-*, and *daughterless-Gal4* driving the UAS-human OGDH caused lethality in flies. This prompted us to test a novel strategy by expressing the human OGDH in the same expression pattern of *dOgdh in vivo*. By combining recently developed technologies and resources (Diao et al., 2015; Gnerer et al., 2015), we were able to create *dOgdh* mutant flies (*dOgdh-T2A-Gal4*) in which the T2A-Gal4 cassette is inserted in a common coding intron of *dOgdh*. The *Gal4* insertion in *dOgdh* locus leads to severe loss of function of *dOgdh* since homozygous *dOgdh-T2A-Gal4* animals die before 1<sup>st</sup> instar larvae stage. We show that expression of the wild-type human *OGDHL* cDNA or wild-type *dOgdh* cDNA by the Gal4 expressed under control of the endogenous *dOgdh* promoter (*dOgdh-T2A-Gal4*) rescued the lethality associated with loss of *dOgdh*. Hence, this methodology will be useful for cDNA rescue experiments that require the correct expression pattern of tested genes.

### Cloning and Transgenesis

A pCaSpeR4 vector having ~5kb genomic DNA fragment that contains promoter (1003bp), coding sequences (3633 bp), and 3'UTR (456 bp) of *dNrd1* were generously provided by A. Leibfried and A. Ephrussi (not published). The insert is cloned into BamHI and NotI sites in pCaSpeR4. We subcloned *dNrd1* genomic fragment into BglII and NotI sites in pattB vector (Bischof et al., 2007) (*pattB-gRes-dNrd1-WT*). The construct was injected into *y,w,ΦC31; VK5* (Venken et al., 2006) embryos, and the transgenic flies were selected.

RE02581, an EST of *dNrd1*, (purchased from DGRC) contains two base pair changes that cause substitution of two amino acids (R13G and A801A). These mutations were corrected by site-directed PCR using primers: dNrd1-R13-F: 5'-acagCGCACATTTGTTTAGAcgaTTCGAATTTACGTACGTAC, dNrd1-R13-R: GTACGTACGTGAAATTCGAATTCGTCTAAACAAATGTGCGCTGT-3', dNrd1-A801-F: 5'-GCAACTATACGGAAGAGTCCgctCATAATGTAATGAACTCGTTG-3', dNrd1-A801-R: 5'-CAACGAGTTCATTACATTATGAGCGGACTCTTCCGTATAGTTGC-3'. The corrected dNrd1 EST clone was amplified by PCR and used for construction of pUASTattB-dNrd1-V5 and pUASTattB-ΔMTS dNrd1-V5. The PCR reactions were performed by using following primers: dNrd1-F EcoRI: 5'-tttgGAATTCCAAATGCTCTGGCAGCGATACAG-3', dNrd1 Δ1-42aa-F EcoRI: 5'-tttgGAATTCCAAATGACCGACCAGGTCAAGTATC-3' and dNrd1-V5-R NotI: 5'-ctaaGCGGCCGCTTAGGTGCTATCCAGTCCGAGCAGTGGATTCGGGATCGGCTTGCCGCCGCTTCCCACC TGCCGATTGCATCCGC-3'. For generating pUASTattB-dNrd1 [E161A], we performed site-directed



mutagenesis using the primers: 5'- CAGGGACTGGCACACTTTCTCgCgCACATGATCTTTATGGGCTC -3' and 5'- GAGCCCATAAAGATCATGTGCGCGAGAAAGTGTGCCAGTCCCTG-3'.

For construction of pUASTattB-human NRD1-V5, -human NRD1 (p.M636VfsX2)-V5, and -human  $\Delta$ MTS NRD1-V5, a full-length NRD1 cDNA, a NRD1 cDNA carrying M636VfsX2 variant from the patient (Figure 2A-B) or a NRD1 cDNA that lacks nucleotides corresponding to the MTS was amplified by PCR from a human NRD1 cDNA clone (3138712, Invitrogen), and then subcloned into pUASTattB vector (Bischof et al., 2007) using primers: NRD1-F NotI: 5'-tttgGCGGCCGCCAAAATGCTGAGGA GAGTCACTGTTG-3', NRD1-V5-R XhoI: 5'-ctaaCTCGAGTTAGGTGCTATCCAGTCCGAGCAGTGGATTTCGGGATCGGCTTGCCGCCGCTTCCCTTTGAC TATTTTATGGTAGG-3', NRD1 M636VfsX2-V5-R XhoI: 5'- cctaaCTCGAG TTAGGTGCTATCCAGTCCGAGCAGTGGATTTCGGGATCGGCTTGCC GCCGCTTCC cacGTTTTCCACATACTCAACTGG -3', and NRD1  $\Delta$ 1-49aa-F NotI: 5'-tttgGCGGCCGCCAAAATGCCTGGAAGGAACAAGGC-3'. For construction of pUASTattB-dOgdh-Flag, a coding sequence was amplified by PCR from the cDNA clone (RE42354, DGRC) and subcloned into pUASTattB vector using primers: dOgdh-PF\_F BclI: 5'-attttgTGATCACAAA ATGCATAGAGCCACACAGCC-3' and dOgdh-PF-Flag\_R XbaI: 5'-agtaaTCTAGATTACTTGTCTCGTCATCGTCCTTGTAAATC GCCGCTTCC GGTCGAAATCGCGTCGTTGAG-3'.

For constructing, pUASTattB- OGDHL, pUASTattB-OGDHL-Flag, pUASTattB-OGDH, and pUASTattB- OGDH-Flag, the following primers were used for amplifying coding sequences from cDNA clones of OGDH (MHS6278-202806532, GE Healthcare) and (MHS6278-202828499, GE Healthcare): hOGDHL-F NotI: 5'-atnttGCGGCCGCAA ATGAGTCAGCTGAGGCTGCTG-3', hOGDHL R XhoI: 5'-agtaaCTCGAGCTAAAATGTCTTGCCCTCAAAGGC-3', hOGDHL-Flag R XhoI: 5'-agtaaCTCGAG TTACTTGTCTCATCGTCCTTGTAAATCAATATCGTGGTCTTGTAGTC GCCGCTTCC AAATGTCTTGCCCTCAAAGGC-3', hOGDH -F NotI: 5'-atnttGCGGCCGCAA ATGTTTCATTTAAGGACTTGT-3', hOGDH-R XhoI: 5'-agtaaCTCGAGCTAGGCTACGAGAAGTTCTTGAAGACGTC-3', hOGDHL-Flag R XhoI: 5'-agtaaCTCGAG TTACTTGTCTCATCGTCCTTGTAAATCAATATCGTGGTCTTGTAGTC GCCGCTTCC CGAGAAGTTCTTGAAGACGTC-3'

pUASTattB-dOgdh (S793L)-Flag, pUASTattB-hOGDHL (S778L), pUASTattB-hOGDHL (S778L)-Flag, pUASTattB-hOGDH (S791L) and pUASTattB-hOGDH (S791L)-Flag were generated by site-directed mutagenesis PCR using primers: dOgdh\_S793L-F: 5'-GAAGGCATGGGCCCCGAGCACTgTCGTGCCGCGTGGAGCGCTTC-3',

dOgdh\_S793L-R: 5'-GAAGCGCTCCACGCGGCACGAcAAGTGCTCGGGGCCCATGCCTTC-3',  
OGDHL\_S778L-F: 5'-GAAGGCATGGGCCCAGAGCACTgTTCAGCGAGGCCCCGAAAGGTTTC-3',  
OGDHL\_S778L-R: 5'-GAACCTTTCGGGCCTCGCTGACaAGTGCTCTGGGCCCCATGCCTTC-3',  
OGDH\_S791L-F: 5'-GAGGGCATGGGTCCAGAACATTgTCCGCCGCCAGAGCGGTTTC-3',  
OGDH\_S791L-R: 5'-GAACCGCTCTGGGCGGGCGGAcaAATGTTCTGGACCCATGCCCTC-3'

A series of pUASTattB-dNrd1 and human NRD1 constructs were injected into *y,w,  $\Phi$ C31; VK33* embryos. A series of pUASTattB-dOgdh, OGDHL and OGDH constructs were injected into *y,w,  $\Phi$ C31; VK37* embryos, and transgenic flies were selected.

For constructing pUASTattB-l(2)tid-Myc, pUASTattB-Hsp60C-Myc, and pUASTattB-Hsc70-5-Myc, the following primers were used for amplifying coding sequences from EST clones (SD10289, AT13565, GM13788, DGRC): l(2)tid-PA\_F EcoRI: 5'-atnttGAATTCAAAA ATGATGATTTCTGTAAAAAATTA-3', l(2)tid-PA Myc\_R NotI: 5'-gtaaGCGGCCGC TTACAGATCCTCTTCTGAGATGAGTTTCTGCTCgcccgttcc CTCGCTCGTTGCTTACT-3', Hsp60C-PA\_F EcoRI: 5'-atnttGAATTCAAAA ATGATGCGCATGTTCCGTTAC-3', Hsp60C-PA Myc\_R NotI: 5'-gtaaGCGGCCGC TTACAGATCCTCTTCTGAGATGAGTTTCTGCTCgcccgttcc CATGCCATTCGCCCATG-3', Hsc70-5-PA\_F NotI : 5'-tttgGCGGCCGCAA ATGCTGCGCGTACCCAAGTTTC-3', Hsc70-5-PA Myc\_R XhoI: tgtaa 5'-CTCGAG TTACAGATCCTCTTCTGAGATGAGTTTCTGCTCgcccgttcc GTTCTTCTCTTCTTCTTGGC-3'



(Jackson ImmunoResearch Cat# 123-495-021). Alexa 488 conjugated (Thermo Fisher Scientific Cat# A-11034 RRID:AB\_2576217), and Cy3 conjugated secondary antibodies (Jackson ImmunoResearch Labs Cat# 715-165-150 RRID:AB\_2340813) were used at 1:200. Samples were mounted in Vectashield (Vector Labs, Burlingame, CA). Imaging was performed using LSM510 confocal microscope (Zeiss). Images were processed with Zeiss LSM Image Browser and Adobe Photoshop.

### Quantitative PCR for mtDNA Content

Method is adapted from (Bai and Wong, 2004). *Drosophila* whole DNA (genomic and mitochondrial) was purified from third instar larvae as the template for PCR. The template DNA was mixed with primers and green supermix reagent (iQ SYBR; Bio-Rad Laboratories). PCR was performed in a thermal cycler (iCycler; Bio-Rad Laboratories), and the data were collected and analyzed using the optical module (iQ5; Bio-Rad Laboratories) and related software following the manufacturer's instructions. The following primer pairs were used to amplify a genomic DNA fragment corresponding to CG9277/ $\beta$ -Tubulin or a mitochondrial DNA fragment corresponding to CG34083/ND5, respectively:  $\beta$ -Tubulin forward, 5'-CCTTCCCACGTCTTCACTTC-3'; and  $\beta$ -Tubulin reverse, 5'-TTCTTGGCATCGAACATCTG-3'; and ND5 forward, 5'-GCAGAAACAGGTGTAGGAGCA-3'; and ND5 reverse, 5'-GCTGCTATAACTAAAAGAGCTCAGA-3'. Dissociation curves for the amplicons were generated after each run to confirm that the fluorescent signals were not attributable to nonspecific signals (primer-dimers). The mtDNA content (mtDNA/ $\beta$ -Tubulin ratio) was calculated using the formula: mtDNA content =  $1/2^{\Delta Ct}$ , where  $\Delta Ct = Ct^{mtDNA} - Ct^{\beta-Tubulin}$ .

### Mitochondrial Functional Assay

Measuring mitochondrial membrane potential by tetramethylrhodamine ethyl ester (TMRE; Molecular Probes, Life Technologies) was carried out in live larval muscle as previously described (Shidara and Hollenbeck, 2010). Live images were taken using a 40x water immersion lens and a Zeiss LSM510 confocal microscope. NADH and ATP levels were measured from whole larval lysates using NAD/NADH Assay kit (abcam, ab65348) and ATP determination kit (A22066, Life Technologies). The ETC enzymatic activity assay was carried out as previously described (Graham et al., 2010). The enzyme activity of OGDH, IDH, MDH, and Aconitase was determined from isolated mitochondria using kits (K678-100, BioVision; K756-100, BioVision; K654-100, BioVision; K716-100, BioVision). Mitochondria were isolated as previously described (Graham et al., 2010). Briefly, an 100  $\mu$ l volume of larvae was homogenized in mitochondrial isolation buffer (225 mM mannitol, 75mM sucrose, 5 mM Hepes [pH7.4], 1 mM EGTA, 0.5% bovine serum albumin (BSA)) using a Dounce homogenizer on ice. Tissue lysates were centrifuged at 1,500g for 5 min at 4°C. Supernatants were transferred to fresh tube, and centrifuged at 8,000g for 15 min to precipitate mitochondria. Discard soup and spare mitochondria pellets for further assays.

### Cell Culture

S2 cells were grown in Schneider's *Drosophila* medium (Life Technologies) supplemented with 10% fetal bovine serum (FBS) and Penicillin-Streptomycin (Sigma) at room temperature (21°C). Mouse embryonic fibroblasts (MEFs) were grown in DMEM (10569-010, Life Technologies) supplemented with 5% FBS and Penicillin-Streptomycin and grown at 37°C.

### Western Blot

Fly larvae or heads were homogenized in 1x Laemmli sample buffer containing 2.5%  $\beta$ -mercaptoethanol (Sigma-Aldrich). After boiling for 5 min, samples were loaded into 4-20% Mini-PROTEAN® TGX gel (Bio-Rad), separated by SDS-PAGE, and transferred to nitrocellulose membranes (Bio-Rad). The following antibodies were used: mouse anti-PDH-1 $\alpha$  (MitoScience LLC Cat# MSP07 RRID:AB\_478296), 1:1,000; mouse anti-NDUFS3

(MitoScience LLC Cat# MS112 RRID:AB\_478239), 1:1,000; mouse anti-ATP5A (Abcam Cat# ab14748 RRID:AB\_301447), 1:1,000; chicken anti-Porin (Graham et al., 2010), 1:3,000; mouse anti-Cyt C (MitoScience LLC Cat# MSA06 RRID:AB\_478285), 1:1,000; mouse anti-actin C4 (MP Biomedicals Cat# 08691002 RRID:AB\_2335304), 1:2,000; rabbit anti-p62 (Rui et al., 2015), 1:3,000; rabbit anti-phospho-p70 S6 kinase (Thr398) (Cell Signaling Technology Cat# 9209S RRID:AB\_2269804), 1:1,000; rabbit anti-S6 kinase (Santa Cruz Biotechnology Cat# sc-9027 RRID:AB\_2182106), 1:1,000; rabbit anti-S6 kinase (Cell Signaling Technology Cat# 9202 RRID:AB\_331676), 1:1,000; rabbit anti-phospho-4E-BP1 (Thr37/46) antibody (Cell Signaling Technology Cat# 2855 RRID:AB\_560835), 1:1,000; rabbit anti-4E-BP1 (Cell Signaling Technology Cat# 9452S RRID:AB\_10693791), 1:1,000; rabbit anti-LC3B (Cell Signaling Technology Cat# 2775 RRID:AB\_915950), 1:1,000.

### Co-Immunoprecipitation

pUASTattB constructs containing cDNAs (e.g. pUASTattB-dNrd1-V5 and pUASTattB-DOGDH-Flag) were transfected into S2 cells together with pAct5-Gal4 (Arbouzova et al., 2006) using Effectene (Qiagen). After 2 days of transfection, cells were washed with ice-cold PBS and collected by centrifugation. Collected cells were lysed in a co-IP buffer (50 mM Tris pH7.4, 150 mM NaCl, 10% glycerol, 0.5% NP-40) containing cOmplete protease inhibitor (Roche). The cell lysates were vortexed every 5 min and placed on ice for 30min, and then centrifuged at 20,000g for 15 min at 4°C. Supernatants were transferred into fresh tubes, and 5 % of supernatants were spared for inputs. The remainder was rotated with anti-V5 resin (A7345, Sigma) or anti-Myc resin (E6654, Sigma) overnight at 4°C. The resins were collected by spinning at 5,000g for 30 sec at 4°C. Supernatants were discarded. The resins were washed with the co-IP buffer three times at 4°C.

For *in vivo* co-IP, *DOGDH-GFP* larvae were homogenized with co-IP buffer containing cOmplete (Roche) using a Dounce homogenizer. Tissue debris was removed by centrifugation at 20,000g for 15 min at 4°C. Clear supernatants were rotated with 15µl of GFP-Trap resin or control resin (Chromotek) for 2 hours at 4°C. Resins were collected by brief spin, and washed with 1ml of co-IP buffer three times at 4°C. Resin-bound proteins were eluted by applying 50µl of elution buffer (Chromotek). The co-precipitated proteins were analyzed by western blot using anti-Flag M2 antibody (Sigma-Aldrich Cat# F1804 RRID:AB\_262044), anti-V5 antibody (Thermo Fisher Scientific Cat# R960-25 RRID:AB\_2556564), and anti-Myc (9B11) antibody (Cell Signaling Technology Cat# 2040 RRID:AB\_2148465).

### Mitochondrial Import Assay

For an import assay, C-terminally Flag-tagged DOGDH protein was produced from a DNA fragment that contains a T7 promoter, coding sequence of *Drosophila* OGDH followed by 2xFlag sequence and polyA using T<sub>N</sub>T® T7 Quick coupled transcription/translation system (L1170, Promega). A total of 200 µg of isolated mitochondria was resuspended in 500 µl of mitochondria import assay buffer (MIAB) (250 mM MOPS/KOH, pH7.2, 2.5mM MgCl<sub>2</sub>, 80 mM KCl, 3% BSA, 2 mM NADH) and pre-incubated at 27°C for 2-3 min. Subsequently, the pre-incubated mitochondria were mixed with DOGDH-Flag protein, and incubated. The reaction was stopped at multiple time points by adding ice-cold SEM buffer (250 mM sucrose, 1 mM EDTA, 10 mM MOS/KOH, pH7.2) containing cOmplete protease inhibitor (Roche). Mitochondria were isolated and washed in SEM buffer three times by centrifugation at 8,000g for 10 min at 4°C. Imported DOGDH-Flag in mitochondria was analyzed by western blot with anti-Flag M2 antibody (Sigma-Aldrich Cat# F1804 RRID:AB\_262044).

### Mitochondrial Luciferase Aggregation Assay

To test mitochondrial chaperone activity of DNRD1, we developed the mitochondrial luciferase aggregation assay by modifying cytosolic luciferase aggregation assay (Ali et al., 2016; Michels et al., 1997). We constructed a *psiCheck-dOgdh-renilla luciferase* reporter (DOGDH-Rluc reporter) by cloning full length DOGDH coding sequence in front of renilla luciferase in frame. This reporter and pAct-Gal4 was transfected into S2 cells with or without *pUASTattB-dNrd1* using Effectene (Qiagen). After 72 hr transfection, the cells were treated with cycloheximide (50 µg/mL for 3 hrs). One batch of cells was lysed immediately with 1x passive lysis buffer

(Promega), which the other two batches were heat-shocked at 42°C for 15 min. The second batch of cells was lysed immediately after heat shock, while the last batch was incubated at 37°C for 3 hrs to recover DOGDH-Rluc reporter activity. Luciferase activity was measured with the Luciferase Assay system (Promega) and the TD-20/20 Luminometer (Turner Designs).

### Mass Spectrometry Procedure for Identification of DNRD1-interacting Proteins

1ml volume of larvae expressing DNRD1-V5 (*da-Gal4>UAST-dNrd1-V5*) or control (*da-Gal4/+*) were homogenized in lysis buffer (50 mM Tris pH7.4, 150 mM NaCl, 10% glycerol, 0.5% NP-40) containing cOmplete protease inhibitor (Roche) and phosphatase inhibitor (P3200, GenDEPOT) using Dounce homogenizer. Homogenized samples were subjected to centrifugation at 20,000g for 15 min at 4°C. Supernatants were centrifuged at 100,000g for 30 min at 4°C. Supernatants (20mg/ml) were incubated with 5 µg of anti-V5 antibody (R960, life technologies) in a rotator at 4°C. Purified DNRD1 complex was resolved on SDS-PAGE (4–20% Tris/glycine gel [Novex; Invitrogen]). Coomassie brilliant blue–stained protein bands were excised and subjected to in-gel digestion with trypsin essentially as previously described (Jung et al., 2005). Vacuum dried peptide was dissolved in 10 µl of loading solution (5% methanol containing 0.1% formic acid) and half of reconstituted samples were subjected to nanoLC-MS/MS analysis with a nano-LC II (Thermo Scientific) coupled to Thermo Velos pro (Thermo Scientific) mass spectrometer. The peptides were loaded onto an in-housed Repronil-Pur Basic C18 (3 µm, Dr. Maisch GmbH, Germany) trap column which was 2 cm X 75 µm size. Then the trap column was washed with loading solution and switched in-line with an in-housed 10 cm x 75 µm column packed with Repronil-Pur Basic C18 equilibrated in 0.1% formic acid/water. The peptides were separated with a 45 min discontinuous gradient of 5–28% acetonitrile/0.1% formic acid at a flow rate of 800 nl/min. Separated peptides were directly electro-sprayed into mass spectrometer. The instrument was operated in the data-dependent mode acquiring fragmentation spectra of the top 35 strongest ions and under direct control of Xcalibur software (Thermo Scientific). Parent MS spectrum and CID fragmented MS/MS spectrum were acquired in the Orbitrap with resolution of 70,000 and 17,500. The full MS range was 375–1300 m/z and the trap target was 3,000,000. MS/MS ion target value was 100,000 ions and the ion selection threshold was 13,000 count. Obtained MS/MS spectra were searched against target-decoy Mouse refseq database in Proteome Discoverer 1.3 interface (PD1.3, Thermo Fisher) with Mascot algorithm (Mascot 2.3, Matrix Science) using Flybase protein database. The precursor mass tolerance was confined within 20 ppm with fragment mass tolerance of 0.5 Dalton and a maximum of two missed cleavage was allowed.

### Fly Genetics and Rapamycin feeding

To overexpress Atg1, we crossed *P{GMR-hid}SS1, y1w\*P{neoFRT}19A/y; ey-Gal4, UAS-FLP (II) males with dNrd1<sup>B</sup>/FM7, Kr-Gal4, UAS-GFP; UAS-Atg1* females. These crosses were placed at 18°C until eclosion of adult flies. The eclosed adult flies transferred to new vials and were incubated in a daily light/dark cycle (at 25°C for 12 hrs with light and at 21°C for 12 hrs with dark) for 35 to 38 days before ERG assay. To overexpressed dominant negative S6k, (*UAS-S6k.KO*), we crossed *P{GMR-hid}SS1, y1w\*P{neoFRT}19A/Y; Rh1-Gal4, UAS-FLP (II) males with dNrd1<sup>A</sup>/FM7, Kr-Gal4, UAS-GFP; UAS-S6k.KQ* ((Barcelo and Stewart, 2002) females and ERG assay was conducted 35-day-old progenies. Rapamycin (3µM) was fed every 3 days for flies whose PRs having *dNrd1* mutant clones or expressing *dOgdh* RNAi.

### Metabolic Measurements Using Mass Spectrometry

#### Reagents and internal standards

High-performance liquid chromatography (HPLC) grade acetonitrile, methanol and water were purchased from Burdick & Jackson (Morristown, NJ). Mass spectrometry grade formic acid and internal standards namely, [15N]2Tryptophan-, Glutamic acid-d5, Thymine-d4, Gibberellic acid, Trans-Zeatin, Jasmonic acid, [15N] Anthranilic acid, and Testosterone-d3 were purchased from Sigma- Aldrich (St. Louis, MO). The calibration solution containing multiple calibrants in acetonitrile/trifluoroacetic acid /water was purchased from (Agilent

Technologies, Santa Clara, CA).

Sample preparation for mass spectrometric analysis The metabolome extraction method described earlier was used for the cell lines and pooled liver controls in this study. Briefly, cells or fly extracts were thawed at 4°C and subjected to freeze-thaw cycle in liquid nitrogen and over the ice three times to rupture the cell membrane. Following this, an 750 µL of ice cold methanol: water (4:1) containing 20 µL of spiked internal standards (8) was added to each cell line. The cells were homogenized for 1 min (30 sec pulse twice) and mixed with 450 µl of ice cold chloroform and vortex mixed in a Multi-Tube Vortexer for 10 min. The resulting homogenate was mixed with 150 µl of ice cold water and vortexed again for 2 min. The homogenate was incubated at -20°C for 20 min and centrifuged at 4°C for 10 min to partition the aqueous and organic layers. The aqueous and organic layers were separated and dried at 37°C for 45 min in an Automatic Environmental Speed Vac® system (Thermo Fisher Scientific, Rockford, IL). The aqueous extract was reconstituted in 500 µl of ice cold methanol:water (50:50) and filtered through 3 KDa molecular filter (Amicon Ultracel -3K Membrane, Millipore Corporation, Billerica, MA) at 4°C for 90 min to remove proteins. The filtrate was dried at 37°C for 45 min in speed vac and stored at -80°C until mass spectrometry analysis. Prior to mass spectrometry analysis, the dried extract was resuspended in 100 µL of methanol:water (50:50) containing 0.1% formic acid and analyzed using Single Reaction Monitoring (SRM). The tissues were stored at -140°C in liquid nitrogen until analysis. For extraction of the metabolome, 25 mg of tissue was homogenized in 1:4 ice-cold water:methanol mixture containing an equimolar mixture of 8 internal standard compounds. This was followed by metabolic extraction using sequential application of ice-cold organic and aqueous solvents (water:methanol:chloroform:water; ratio 1:4:3:1), deproteinization and drying of the extract as mentioned above.

Liquid Chromatography- Mass spectrometry: HPLC analysis was performed using an Agilent 1290 series HPLC system equipped with a degasser, binary pump, thermostatted autosampler and column oven (all from Agilent Technologies, Santa Clara, CA). The SRM-based measurement of relative metabolite levels, used either reverse phase or normal phase chromatographic separation. All samples were kept at 4°C and 5 µl was used for analysis.

#### Separation of TCA metabolites

Targeting the metabolites, the normal phase chromatographic separation was also used for targeted identification of metabolites. This employed solvents containing water (solvent A), with solvent A modified by the addition of 5mM Ammonium acetate (pH 9.9), and 100% acetonitrile (ACN) solvent B. The binary pump flow rate was 0.2 ml/min with a gradient spanning 80 % B to 2 % B over a 20 minute period followed by 2% B to 80% B for a 5 min period and followed by 80% B for 13 minute time period. The flow rate was gradually increased during the separation from 0.2 mL/min (0-20 mins), 0.3 mL/min (20.1-25 min), 0.35 mL/min (25-30 min), 0.4 mL/min (30-37.99 min) and finally set at 0.2 mL/min (5 min). Metabolites were separated on a Luna Amino (NH<sub>2</sub>) column (4µm, 100A 2.1x150mm, Phenomenex), that was maintained in a temperature controlled chamber (37°C). All the columns used in this study were washed and reconditioned after every 50 injections.

#### Separation of amino acid metabolites

Targeted profiling (SRM) for the Amino acids, the RP chromatographic method employed a gradient containing water (solvent A) and acetonitrile (ACN, solvent B, with both solvents containing 0.2% Acetic acid and 0.1% formic acid). Separation of metabolites was performed on a Zorbax Eclipse XDB-C18 column (50 × 4.6 mm i.d.; 1.8 µm, Agilent Technologies, CA) maintained at 37°C. The binary pump flow rate was 0.2 ml/min with a gradient spanning 2% B to 95% B over a 25 minute time period.

The mass spectrometric analysis was performed on 6430 QQQ-LC/MS (Agilent Technologies, Santa Clara, CA). The mass spectrometer was operated in both electrospray positive and negative ionization modes, with a capillary voltage of either 3500 V (positive ionization) or 3000 V (negative ionization), a collision gas flow rate of 10 L/min and a nebulizer gas flow rate of 35 L/min. The temperature of nebulizer gas was maintained at 350°C. Nitrogen was used as the collision gas at a collision cell pressure of 2.39X10<sup>-5</sup> Torr. For maximum sensitivity, the fragmentor voltage and collision energy for each metabolite were optimized separately using the optimizer® software (Agilent Technologies, Santa Clara, CA) and the optimized values were used for the SRM assays.

### **Whole-Exome Capture, Sequencing and Data analysis**

All of the subjects enrolled in the BHCMG underwent whole-exome sequencing using methods that have been previously described in detail (Lupski et al., 2013). Produced sequence reads were mapped and aligned to the

GRCh37 (hg19) human genome reference assembly using the HGSC Mercury analysis pipeline (<http://www.tinyurl.com/HGSC-Mercury/>) (Reid et al., 2014). Variants were determined and called using the Atlas2 (Danecek et al., 2011) suite to produce a variant call file (VCF) (Bainbridge et al., 2011). High-quality variants were annotated using an in-house developed suite of annotation tools (Untergasser et al., 2012).

During the analyses of candidate variants/mutations observed after computational filtering, we further prioritized genes/variants using external publicly available databases. These included the 1000 Genomes Project (<http://www.1000genomes.org>) and other large-scale exome sequencing projects including the Exome variant server, NHLBI GO Exome Sequencing Project (ESP), Seattle, WA (<http://evs.gs.washington.edu/EVS/>), our "in-house-generated" exomes (from ~5,000 individuals participating in the BHCMG initiative) at Baylor College of Medicine (BCM) Human Genome Sequencing Center, and the Atherosclerosis Risk in Communities Study (ARIC) Database (<http://drupal.cscg.unc.edu/aric/>) (Gambin et al., 2015). The Exome Aggregation Consortium (ExAC), Cambridge, MA (URL: <http://exac.broadinstitute.org>) [Aug 2015] was used to search for homozygous loss-of-function variants in specific candidate genes.

### Supplemental References

Ali, Y.O., Allen, H.M., Yu, L., Li-Kroeger, D., Bakhshizadehmahmoudi, D., Hatcher, A., McCabe, C., Xu, J., Bjorklund, N., Tagliatalata, G., et al. (2016). NMNAT2:HSP90 Complex Mediates Proteostasis in Proteinopathies. *PLoS Biol.* *14*, e1002472.

Arbouzova, N.I., Bach, E.A., and Zeidler, M.P. (2006). Ken & barbie selectively regulates the expression of a subset of Jak/STAT pathway target genes. *Curr. Biol.* *16*, 80–88.

Bai, R.K., and Wong, L.J.C. (2004). Detection and quantification of heteroplasmic mutant mitochondrial DNA by real-time amplification refractory mutation system quantitative PCR analysis: A single-step approach. *Clin. Chem.* *50*, 996–1001.

Bainbridge, M.N., Wang, M., Wu, Y., Newsham, I., Muzny, D.M., Jefferies, J.L., Albert, T.J., Burgess, D.L., and Gibbs, R.A. (2011). Targeted enrichment beyond the consensus coding DNA sequence exome reveals exons with higher variant densities. *Genome Biol.* *12*, R68.

Barcelo, H., and Stewart, M.J. (2002). Altering *Drosophila* S6 kinase activity is consistent with a role for S6 kinase in growth. *Genesis* *34*, 83–85.

Baxter, P.S., Rigby, a. S., Rotsaert, M.H.E.P.D., and Wright, I. (2009). Acquired Microcephaly: Causes, Patterns, Motor and IQ Effects, and Associated Growth Changes. *Pediatrics* *124*, 590–595.

Bellen, H.J., and Budnik, V. (2000). The neuromuscular junction. In *Drosophila Protocols*, M. Ashburner, and R.S. Hawley, eds. (New York: Cold Spring Harbor Laboratory Press), pp. 175–199.

Bischof, J., Maeda, R.K., Hediger, M., Karch, F., and Basler, K. (2007). An optimized transgenesis system for *Drosophila* using germ-line-specific phiC31 integrases. *Proc. Natl. Acad. Sci. U. S. A.* *104*, 3312–3317.

Danecek, P., Auton, A., Abecasis, G., Albers, C. a., Banks, E., DePristo, M. a., Handsaker, R.E., Lunter, G., Marth, G.T., Sherry, S.T., et al. (2011). The variant call format and VCFtools. *Bioinformatics* *27*, 2156–2158.

Diao, F., Ironfield, H., Luan, H., Diao, F., Shropshire, W.C., Ewer, J., Marr, E., Potter, C.J., Landgraf, M., and White, B.H. (2015). Plug-and-Play Genetic Access to *Drosophila* Cell Types using Exchangeable Exon Cassettes. *Cell Rep.* *10*, 1410–1421.

Gambin, T., Jhangiani, S.N., Below, J.E., Campbell, I.M., Wisniewski, W., Muzny, D.M., Staples, J., Morrison, A.C., Bainbridge, M.N., Penney, S., et al. (2015). Secondary findings and carrier test frequencies in a large multiethnic sample. *Genome Med.* *7*, 54.

Gnerer, J.P., Venken, K.J.T., and Dierick, H.A. (2015). Gene-specific cell labeling using MiMIC transposons. *Nucleic Acids Res.* *43*, e56–e56.

Graham, B.H., Li, Z., Alesii, E.P., Versteken, P., Lee, C., Wang, J., and Craigen, W.J. (2010). Neurologic

dysfunction and male infertility in *Drosophila* porin mutants: A new model for mitochondrial dysfunction and disease. *J. Biol. Chem.* *285*, 11143–11153.

Jung, S.Y., Malovannaya, A., Wei, J., O'Malley, B.W., and Qin, J. (2005). Proteomic analysis of steady-state nuclear hormone receptor coactivator complexes. *Mol. Endocrinol.* *19*, 2451–2465.

Lupski, J.R., Gonzaga-Jauregui, C., Yang, Y., Bainbridge, M.N., Jhangiani, S., Buhay, C.J., Kovar, C.L., Wang, M., Hawes, A.C., Reid, J.G., et al. (2013). Exome sequencing resolves apparent incidental findings and reveals further complexity of SH3TC2 variant alleles causing Charcot-Marie-Tooth neuropathy. *Genome Med.* *5*, 57.

van Maldegem, B.T., Wanders, R.J. a., and Wijburg, F. a. (2010). Clinical aspects of short-chain acyl-CoA dehydrogenase deficiency. *J. Inherit. Metab. Dis.* *33*, 507–511.

Michels, A.A., Kanon, B., Konings, A.W., Ohtsuka, K., Bensaude, O., and Kampinga, H.H. (1997). Hsp70 and Hsp40 chaperone activities in the cytoplasm and the nucleus of mammalian cells. *J. Biol. Chem.* *272*, 33283–33289.

Reid, J.G., Carroll, A., Veeraraghavan, N., Dahdouli, M., Sundquist, A., English, A., Bainbridge, M., White, S., Salerno, W., Buhay, C., et al. (2014). Launching genomics into the cloud: deployment of Mercury, a next generation sequence analysis pipeline. *BMC Bioinformatics* *15*, 30.

Rui, Y.-N., Xu, Z., Patel, B., Chen, Z., Chen, D., Tito, A., David, G., Sun, Y., Stimming, E.F., Bellen, H.J., et al. (2015). Huntingtin functions as a scaffold for selective macroautophagy. *Nat. Cell Biol.* *17*, 262–275.

Shidara, Y., and Hollenbeck, P.J. (2010). Defects in mitochondrial axonal transport and membrane potential without increased reactive oxygen species production in a *Drosophila* model of Friedreich ataxia. *J. Neurosci.* *30*, 11369–11378.

Untergasser, A., Cutcutache, I., Koressaar, T., Ye, J., Faircloth, B.C., Remm, M., and Rozen, S.G. (2012). Primer3-new capabilities and interfaces. *Nucleic Acids Res.* *40*.

Venken, K.J.T., He, Y., Hoskins, R.A., and Bellen, H.J. (2006). P[acman]: a BAC transgenic platform for targeted insertion of large DNA fragments in *D. melanogaster*. *Science* *314*, 1747–1751.
